# Supplementary material
Source: publisher figshare collection journal article supplement (https://gsajournals.figshare.com/ndownloader/files/18919160)
Supplement: Supplementary file 1 [file 18919160]

AnimID	HeadPhenotype	PollGenotype	PollTestMarkerSNPs	Allele1	Allele2
DMR101	Scur	HPc	rs799187101G>A	G	G
DMR101	Scur	HPc	rs799187101G>A-2	G	G
DMR101	Scur	HPc	rs799187101G>A-3	G	G
DMR101	Scur	HPc	rs800947704C>T	C	C
DMR101	Scur	HPc	rs800947704C>T-2	C	C
DMR101	Scur	HPc	rs800947704C>T-3	C	C
DMR101	Scur	HPc	rs799403053T>C	T	T
DMR101	Scur	HPc	rs799403053T>C-2	T	T
DMR101	Scur	HPc	rs799403053T>C-3	T	T
DMR101	Scur	HPc	rs210350155C>A	C	C
DMR101	Scur	HPc	rs210350155C>A-2	C	C
DMR101	Scur	HPc	rs210350155C>A-3	C	C
DMR101	Scur	HPc	rs797088784G>A	G	G
DMR101	Scur	HPc	rs797088784G>A-3	G	G
DMR101	Scur	HPc	rs797088784G>A-4	G	G
DMR101	Scur	HPc	rs799920960C>G	C	C
DMR101	Scur	HPc	rs799920960C>G-1	C	C
DMR101	Scur	HPc	rs383143898_A	T	G
DMR101	Scur	HPc	rs383143898_B	T	C
DMR101	Scur	HPc	rs383143898_C	T	G
DMR101	Scur	HPc	rs383143898_D	T	C
DMR101	Scur	HPc	rs801127025_A	A	A
DMR101	Scur	HPc	rs801127025_B	A	A
DMR101	Scur	HPc	rs801127025_C	A	A
DMR101	Scur	HPc	rs801127025_D	A	A
DMR35	Poll	HPc	rs799187101G>A	G	G
DMR35	Poll	HPc	rs799187101G>A-2	G	G
DMR35	Poll	HPc	rs799187101G>A-3	G	G
DMR35	Poll	HPc	rs800947704C>T	C	C
DMR35	Poll	HPc	rs800947704C>T-2	C	C
DMR35	Poll	HPc	rs800947704C>T-3	C	C
DMR35	Poll	HPc	rs799403053T>C	T	T
DMR35	Poll	HPc	rs799403053T>C-2	T	T
DMR35	Poll	HPc	rs799403053T>C-3	T	T
DMR35	Poll	HPc	rs210350155C>A	C	C
DMR35	Poll	HPc	rs210350155C>A-2	C	C
DMR35	Poll	HPc	rs210350155C>A-3	C	C
DMR35	Poll	HPc	rs797088784G>A	G	G
DMR35	Poll	HPc	rs797088784G>A-3	G	G
DMR35	Poll	HPc	rs797088784G>A-4	G	G
DMR35	Poll	HPc	rs799920960C>G	C	C
DMR35	Poll	HPc	rs799920960C>G-1	C	C
DMR35	Poll	HPc	rs383143898_A	T	G
DMR35	Poll	HPc	rs383143898_B	T	C
DMR35	Poll	HPc	rs383143898_C	T	G
DMR35	Poll	HPc	rs383143898_D	T	C
DMR35	Poll	HPc	rs801127025_A	A	A
DMR35	Poll	HPc	rs801127025_B	A	A
DMR35	Poll	HPc	rs801127025_C	A	A
DMR35	Poll	HPc	rs801127025_D	A	A
DMR102	Scur	HPc	rs799187101G>A	G	G
DMR102	Scur	HPc	rs799187101G>A-2	G	G
DMR102	Scur	HPc	rs799187101G>A-3	G	G
DMR102	Scur	HPc	rs800947704C>T	C	C
DMR102	Scur	HPc	rs800947704C>T-2	C	C
DMR102	Scur	HPc	rs800947704C>T-3	C	C
DMR102	Scur	HPc	rs799403053T>C	T	T
DMR102	Scur	HPc	rs799403053T>C-2	T	T
DMR102	Scur	HPc	rs799403053T>C-3	T	T
DMR102	Scur	HPc	rs210350155C>A	C	C
DMR102	Scur	HPc	rs210350155C>A-2	C	C
DMR102	Scur	HPc	rs210350155C>A-3	C	C
DMR102	Scur	HPc	rs797088784G>A	G	G
DMR102	Scur	HPc	rs797088784G>A-3	G	G
DMR102	Scur	HPc	rs797088784G>A-4	G	G
DMR102	Scur	HPc	rs799920960C>G	C	C
DMR102	Scur	HPc	rs799920960C>G-1	C	C
DMR102	Scur	HPc	rs383143898_A	T	G
DMR102	Scur	HPc	rs383143898_B	T	C
DMR102	Scur	HPc	rs383143898_C	T	G
DMR102	Scur	HPc	rs383143898_D	T	C
DMR102	Scur	HPc	rs801127025_A	A	A
DMR102	Scur	HPc	rs801127025_B	A	A
DMR102	Scur	HPc	rs801127025_C	A	A
DMR102	Scur	HPc	rs801127025_D	A	A
DMR36	Poll	PcPc	rs799187101G>A	G	G
DMR36	Poll	PcPc	rs799187101G>A-2	G	G
DMR36	Poll	PcPc	rs799187101G>A-3	G	G
DMR36	Poll	PcPc	rs800947704C>T	C	C
DMR36	Poll	PcPc	rs800947704C>T-2	C	C
DMR36	Poll	PcPc	rs800947704C>T-3	C	C
DMR36	Poll	PcPc	rs799403053T>C	T	T
DMR36	Poll	PcPc	rs799403053T>C-2	T	T
DMR36	Poll	PcPc	rs799403053T>C-3	T	T
DMR36	Poll	PcPc	rs210350155C>A	C	C
DMR36	Poll	PcPc	rs210350155C>A-2	C	C
DMR36	Poll	PcPc	rs210350155C>A-3	C	C
DMR36	Poll	PcPc	rs797088784G>A	G	G
DMR36	Poll	PcPc	rs797088784G>A-3	G	G
DMR36	Poll	PcPc	rs797088784G>A-4	G	G
DMR36	Poll	PcPc	rs799920960C>G	C	C
DMR36	Poll	PcPc	rs799920960C>G-1	C	C
DMR36	Poll	PcPc	rs383143898_A	T	T
DMR36	Poll	PcPc	rs383143898_B	T	T
DMR36	Poll	PcPc	rs383143898_C	T	T
DMR36	Poll	PcPc	rs383143898_D	T	T
DMR36	Poll	PcPc	rs801127025_A	A	A
DMR36	Poll	PcPc	rs801127025_B	A	A
DMR36	Poll	PcPc	rs801127025_C	A	A
DMR36	Poll	PcPc	rs801127025_D	A	A
DMR103	Scur	HPc	rs799187101G>A	G	G
DMR103	Scur	HPc	rs799187101G>A-2	G	G
DMR103	Scur	HPc	rs799187101G>A-3	G	G
DMR103	Scur	HPc	rs800947704C>T	C	C
DMR103	Scur	HPc	rs800947704C>T-2	C	C
DMR103	Scur	HPc	rs800947704C>T-3	C	C
DMR103	Scur	HPc	rs799403053T>C	T	T
DMR103	Scur	HPc	rs799403053T>C-2	T	T
DMR103	Scur	HPc	rs799403053T>C-3	T	T
DMR103	Scur	HPc	rs210350155C>A	C	C
DMR103	Scur	HPc	rs210350155C>A-2	C	C
DMR103	Scur	HPc	rs210350155C>A-3	C	C
DMR103	Scur	HPc	rs797088784G>A	G	G
DMR103	Scur	HPc	rs797088784G>A-3	G	G
DMR103	Scur	HPc	rs797088784G>A-4	G	G
DMR103	Scur	HPc	rs799920960C>G	C	C
DMR103	Scur	HPc	rs799920960C>G-1	C	C
DMR103	Scur	HPc	rs383143898_A	T	G
DMR103	Scur	HPc	rs383143898_B	T	C
DMR103	Scur	HPc	rs383143898_C	T	G
DMR103	Scur	HPc	rs383143898_D	T	C
DMR103	Scur	HPc	rs801127025_A	A	A
DMR103	Scur	HPc	rs801127025_B	A	A
DMR103	Scur	HPc	rs801127025_C	A	A
DMR103	Scur	HPc	rs801127025_D	A	A
DMR104	Scur	HPc	rs799187101G>A	G	G
DMR104	Scur	HPc	rs799187101G>A-2	G	G
DMR104	Scur	HPc	rs799187101G>A-3	G	G
DMR104	Scur	HPc	rs800947704C>T	C	C
DMR104	Scur	HPc	rs800947704C>T-2	C	C
DMR104	Scur	HPc	rs800947704C>T-3	C	C
DMR104	Scur	HPc	rs799403053T>C	T	T
DMR104	Scur	HPc	rs799403053T>C-2	T	T
DMR104	Scur	HPc	rs799403053T>C-3	T	T
DMR104	Scur	HPc	rs210350155C>A	C	C
DMR104	Scur	HPc	rs210350155C>A-2	C	C
DMR104	Scur	HPc	rs210350155C>A-3	C	C
DMR104	Scur	HPc	rs797088784G>A	G	G
DMR104	Scur	HPc	rs797088784G>A-3	G	G
DMR104	Scur	HPc	rs797088784G>A-4	G	G
DMR104	Scur	HPc	rs799920960C>G	C	C
DMR104	Scur	HPc	rs799920960C>G-1	C	C
DMR104	Scur	HPc	rs383143898_A	T	G
DMR104	Scur	HPc	rs383143898_B	T	C
DMR104	Scur	HPc	rs383143898_C	T	G
DMR104	Scur	HPc	rs383143898_D	T	C
DMR104	Scur	HPc	rs801127025_A	A	A
DMR104	Scur	HPc	rs801127025_B	A	A
DMR104	Scur	HPc	rs801127025_C	A	A
DMR104	Scur	HPc	rs801127025_D	A	A
DMR105	Scur	HPc	rs799187101G>A	G	G
DMR105	Scur	HPc	rs799187101G>A-2	G	G
DMR105	Scur	HPc	rs799187101G>A-3	G	G
DMR105	Scur	HPc	rs800947704C>T	C	C
DMR105	Scur	HPc	rs800947704C>T-2	C	C
DMR105	Scur	HPc	rs800947704C>T-3	C	C
DMR105	Scur	HPc	rs799403053T>C	T	T
DMR105	Scur	HPc	rs799403053T>C-2	T	T
DMR105	Scur	HPc	rs799403053T>C-3	T	T
DMR105	Scur	HPc	rs210350155C>A	C	C
DMR105	Scur	HPc	rs210350155C>A-2	C	C
DMR105	Scur	HPc	rs210350155C>A-3	C	C
DMR105	Scur	HPc	rs797088784G>A	G	G
DMR105	Scur	HPc	rs797088784G>A-3	G	G
DMR105	Scur	HPc	rs797088784G>A-4	G	G
DMR105	Scur	HPc	rs799920960C>G	C	C
DMR105	Scur	HPc	rs799920960C>G-1	C	C
DMR105	Scur	HPc	rs383143898_A	T	G
DMR105	Scur	HPc	rs383143898_B	T	C
DMR105	Scur	HPc	rs383143898_C	T	G
DMR105	Scur	HPc	rs383143898_D	T	C
DMR105	Scur	HPc	rs801127025_A	A	A
DMR105	Scur	HPc	rs801127025_B	A	A
DMR105	Scur	HPc	rs801127025_C	A	A
DMR105	Scur	HPc	rs801127025_D	A	A
DMR3	Horn	HH	rs799187101G>A	G	G
DMR3	Horn	HH	rs799187101G>A-2	G	G
DMR3	Horn	HH	rs799187101G>A-3	G	G
DMR3	Horn	HH	rs800947704C>T	C	C
DMR3	Horn	HH	rs800947704C>T-2	C	C
DMR3	Horn	HH	rs800947704C>T-3	C	C
DMR3	Horn	HH	rs799403053T>C	T	T
DMR3	Horn	HH	rs799403053T>C-2	T	T
DMR3	Horn	HH	rs799403053T>C-3	T	T
DMR3	Horn	HH	rs210350155C>A	C	C
DMR3	Horn	HH	rs210350155C>A-2	C	C
DMR3	Horn	HH	rs210350155C>A-3	C	C
DMR3	Horn	HH	rs797088784G>A	G	G
DMR3	Horn	HH	rs797088784G>A-3	G	G
DMR3	Horn	HH	rs797088784G>A-4	G	G
DMR3	Horn	HH	rs799920960C>G	C	C
DMR3	Horn	HH	rs799920960C>G-1	C	C
DMR3	Horn	HH	rs383143898_A	G	G
DMR3	Horn	HH	rs383143898_B	C	C
DMR3	Horn	HH	rs383143898_C	G	G
DMR3	Horn	HH	rs383143898_D	C	C
DMR3	Horn	HH	rs801127025_A	A	A
DMR3	Horn	HH	rs801127025_B	A	A
DMR3	Horn	HH	rs801127025_C	A	A
DMR3	Horn	HH	rs801127025_D	A	A
DMR37	Poll	PcPc	rs799187101G>A	G	G
DMR37	Poll	PcPc	rs799187101G>A-2	G	G
DMR37	Poll	PcPc	rs799187101G>A-3	G	G
DMR37	Poll	PcPc	rs800947704C>T	C	C
DMR37	Poll	PcPc	rs800947704C>T-2	C	C
DMR37	Poll	PcPc	rs800947704C>T-3	C	C
DMR37	Poll	PcPc	rs799403053T>C	T	T
DMR37	Poll	PcPc	rs799403053T>C-2	T	T
DMR37	Poll	PcPc	rs799403053T>C-3	T	T
DMR37	Poll	PcPc	rs210350155C>A	C	C
DMR37	Poll	PcPc	rs210350155C>A-2	C	C
DMR37	Poll	PcPc	rs210350155C>A-3	C	C
DMR37	Poll	PcPc	rs797088784G>A	G	G
DMR37	Poll	PcPc	rs797088784G>A-3	G	G
DMR37	Poll	PcPc	rs797088784G>A-4	G	G
DMR37	Poll	PcPc	rs799920960C>G	C	C
DMR37	Poll	PcPc	rs799920960C>G-1	C	C
DMR37	Poll	PcPc	rs383143898_A	T	T
DMR37	Poll	PcPc	rs383143898_B	T	T
DMR37	Poll	PcPc	rs383143898_C	T	T
DMR37	Poll	PcPc	rs383143898_D	T	T
DMR37	Poll	PcPc	rs801127025_A	A	A
DMR37	Poll	PcPc	rs801127025_B	A	A
DMR37	Poll	PcPc	rs801127025_C	A	A
DMR37	Poll	PcPc	rs801127025_D	A	A
DMR106	Scur	HPc	rs799187101G>A	G	G
DMR106	Scur	HPc	rs799187101G>A-2	G	G
DMR106	Scur	HPc	rs799187101G>A-3	G	G
DMR106	Scur	HPc	rs800947704C>T	C	C
DMR106	Scur	HPc	rs800947704C>T-2	C	C
DMR106	Scur	HPc	rs800947704C>T-3	C	C
DMR106	Scur	HPc	rs799403053T>C	T	T
DMR106	Scur	HPc	rs799403053T>C-2	T	T
DMR106	Scur	HPc	rs799403053T>C-3	T	T
DMR106	Scur	HPc	rs210350155C>A	C	C
DMR106	Scur	HPc	rs210350155C>A-2	C	C
DMR106	Scur	HPc	rs210350155C>A-3	C	C
DMR106	Scur	HPc	rs797088784G>A	G	G
DMR106	Scur	HPc	rs797088784G>A-3	G	G
DMR106	Scur	HPc	rs797088784G>A-4	G	G
DMR106	Scur	HPc	rs799920960C>G	C	C
DMR106	Scur	HPc	rs799920960C>G-1	C	C
DMR106	Scur	HPc	rs383143898_A	T	G
DMR106	Scur	HPc	rs383143898_B	T	C
DMR106	Scur	HPc	rs383143898_C	T	G
DMR106	Scur	HPc	rs383143898_D	T	C
DMR106	Scur	HPc	rs801127025_A	A	A
DMR106	Scur	HPc	rs801127025_B	A	A
DMR106	Scur	HPc	rs801127025_C	A	A
DMR106	Scur	HPc	rs801127025_D	A	A
DMR38	Poll	PcPc	rs799187101G>A	G	G
DMR38	Poll	PcPc	rs799187101G>A-2	G	G
DMR38	Poll	PcPc	rs799187101G>A-3	G	G
DMR38	Poll	PcPc	rs800947704C>T	C	C
DMR38	Poll	PcPc	rs800947704C>T-2	C	C
DMR38	Poll	PcPc	rs800947704C>T-3	C	C
DMR38	Poll	PcPc	rs799403053T>C	T	T
DMR38	Poll	PcPc	rs799403053T>C-2	T	T
DMR38	Poll	PcPc	rs799403053T>C-3	T	T
DMR38	Poll	PcPc	rs210350155C>A	C	C
DMR38	Poll	PcPc	rs210350155C>A-2	C	C
DMR38	Poll	PcPc	rs210350155C>A-3	C	C
DMR38	Poll	PcPc	rs797088784G>A	G	G
DMR38	Poll	PcPc	rs797088784G>A-3	G	G
DMR38	Poll	PcPc	rs797088784G>A-4	G	G
DMR38	Poll	PcPc	rs799920960C>G	C	C
DMR38	Poll	PcPc	rs799920960C>G-1	C	C
DMR38	Poll	PcPc	rs383143898_A	T	T
DMR38	Poll	PcPc	rs383143898_B	T	T
DMR38	Poll	PcPc	rs383143898_C	T	T
DMR38	Poll	PcPc	rs383143898_D	T	T
DMR38	Poll	PcPc	rs801127025_A	A	A
DMR38	Poll	PcPc	rs801127025_B	A	A
DMR38	Poll	PcPc	rs801127025_C	A	A
DMR38	Poll	PcPc	rs801127025_D	A	A
DMR39	Poll	PcPc	rs799187101G>A	G	G
DMR39	Poll	PcPc	rs799187101G>A-2	G	G
DMR39	Poll	PcPc	rs799187101G>A-3	G	G
DMR39	Poll	PcPc	rs800947704C>T	C	C
DMR39	Poll	PcPc	rs800947704C>T-2	C	C
DMR39	Poll	PcPc	rs800947704C>T-3	C	C
DMR39	Poll	PcPc	rs799403053T>C	T	T
DMR39	Poll	PcPc	rs799403053T>C-2	T	T
DMR39	Poll	PcPc	rs799403053T>C-3	T	T
DMR39	Poll	PcPc	rs210350155C>A	C	C
DMR39	Poll	PcPc	rs210350155C>A-2	C	C
DMR39	Poll	PcPc	rs210350155C>A-3	C	C
DMR39	Poll	PcPc	rs797088784G>A	G	G
DMR39	Poll	PcPc	rs797088784G>A-3	G	G
DMR39	Poll	PcPc	rs797088784G>A-4	G	G
DMR39	Poll	PcPc	rs799920960C>G	C	C
DMR39	Poll	PcPc	rs799920960C>G-1	C	C
DMR39	Poll	PcPc	rs383143898_A	T	T
DMR39	Poll	PcPc	rs383143898_B	T	T
DMR39	Poll	PcPc	rs383143898_C	T	T
DMR39	Poll	PcPc	rs383143898_D	T	T
DMR39	Poll	PcPc	rs801127025_A	A	A
DMR39	Poll	PcPc	rs801127025_B	A	A
DMR39	Poll	PcPc	rs801127025_C	A	A
DMR39	Poll	PcPc	rs801127025_D	A	A
DMR40	Poll	HPf	rs799187101G>A	A	G
DMR40	Poll	HPf	rs799187101G>A-2	A	G
DMR40	Poll	HPf	rs799187101G>A-3	A	G
DMR40	Poll	HPf	rs800947704C>T	T	C
DMR40	Poll	HPf	rs800947704C>T-2	T	C
DMR40	Poll	HPf	rs800947704C>T-3	T	C
DMR40	Poll	HPf	rs799403053T>C	T	C
DMR40	Poll	HPf	rs799403053T>C-2	T	C
DMR40	Poll	HPf	rs799403053T>C-3	T	C
DMR40	Poll	HPf	rs210350155C>A	A	C
DMR40	Poll	HPf	rs210350155C>A-2	A	C
DMR40	Poll	HPf	rs210350155C>A-3	A	C
DMR40	Poll	HPf	rs797088784G>A	A	G
DMR40	Poll	HPf	rs797088784G>A-3	A	G
DMR40	Poll	HPf	rs797088784G>A-4	A	G
DMR40	Poll	HPf	rs799920960C>G	C	G
DMR40	Poll	HPf	rs799920960C>G-1	C	G
DMR40	Poll	HPf	rs383143898_A	G	G
DMR40	Poll	HPf	rs383143898_B	C	C
DMR40	Poll	HPf	rs383143898_C	G	G
DMR40	Poll	HPf	rs383143898_D	C	C
DMR40	Poll	HPf	rs801127025_A	A	G
DMR40	Poll	HPf	rs801127025_B	A	G
DMR40	Poll	HPf	rs801127025_C	A	G
DMR40	Poll	HPf	rs801127025_D	A	G
DMR61	Poll	HPc	rs799187101G>A	G	G
DMR61	Poll	HPc	rs799187101G>A-2	G	G
DMR61	Poll	HPc	rs799187101G>A-3	G	G
DMR61	Poll	HPc	rs800947704C>T	C	C
DMR61	Poll	HPc	rs800947704C>T-2	C	C
DMR61	Poll	HPc	rs800947704C>T-3	C	C
DMR61	Poll	HPc	rs799403053T>C	T	T
DMR61	Poll	HPc	rs799403053T>C-2	T	T
DMR61	Poll	HPc	rs799403053T>C-3	T	T
DMR61	Poll	HPc	rs210350155C>A	C	C
DMR61	Poll	HPc	rs210350155C>A-2	C	C
DMR61	Poll	HPc	rs210350155C>A-3	C	C
DMR61	Poll	HPc	rs797088784G>A	G	G
DMR61	Poll	HPc	rs797088784G>A-3	G	G
DMR61	Poll	HPc	rs797088784G>A-4	G	G
DMR61	Poll	HPc	rs799920960C>G	C	C
DMR61	Poll	HPc	rs799920960C>G-1	C	C
DMR61	Poll	HPc	rs383143898_A	T	G
DMR61	Poll	HPc	rs383143898_B	T	C
DMR61	Poll	HPc	rs383143898_C	T	G
DMR61	Poll	HPc	rs383143898_D	T	C
DMR61	Poll	HPc	rs801127025_A	A	A
DMR61	Poll	HPc	rs801127025_B	A	A
DMR61	Poll	HPc	rs801127025_C	A	A
DMR61	Poll	HPc	rs801127025_D	A	A
DMR62	Poll	HPc	rs799187101G>A	G	G
DMR62	Poll	HPc	rs799187101G>A-2	G	G
DMR62	Poll	HPc	rs799187101G>A-3	G	G
DMR62	Poll	HPc	rs800947704C>T	C	C
DMR62	Poll	HPc	rs800947704C>T-2	C	C
DMR62	Poll	HPc	rs800947704C>T-3	C	C
DMR62	Poll	HPc	rs799403053T>C	T	T
DMR62	Poll	HPc	rs799403053T>C-2	T	T
DMR62	Poll	HPc	rs799403053T>C-3	T	T
DMR62	Poll	HPc	rs210350155C>A	C	C
DMR62	Poll	HPc	rs210350155C>A-2	C	C
DMR62	Poll	HPc	rs210350155C>A-3	C	C
DMR62	Poll	HPc	rs797088784G>A	G	G
DMR62	Poll	HPc	rs797088784G>A-3	G	G
DMR62	Poll	HPc	rs797088784G>A-4	G	G
DMR62	Poll	HPc	rs799920960C>G	C	C
DMR62	Poll	HPc	rs799920960C>G-1	C	C
DMR62	Poll	HPc	rs383143898_A	T	G
DMR62	Poll	HPc	rs383143898_B	T	C
DMR62	Poll	HPc	rs383143898_C	T	G
DMR62	Poll	HPc	rs383143898_D	T	C
DMR62	Poll	HPc	rs801127025_A	A	A
DMR62	Poll	HPc	rs801127025_B	A	A
DMR62	Poll	HPc	rs801127025_C	A	A
DMR62	Poll	HPc	rs801127025_D	A	A
DMR12	Horn	HH	rs799187101G>A	G	G
DMR12	Horn	HH	rs799187101G>A-2	G	G
DMR12	Horn	HH	rs799187101G>A-3	G	G
DMR12	Horn	HH	rs800947704C>T	-	-
DMR12	Horn	HH	rs800947704C>T-2	-	-
DMR12	Horn	HH	rs800947704C>T-3	-	-
DMR12	Horn	HH	rs799403053T>C	T	T
DMR12	Horn	HH	rs799403053T>C-2	T	T
DMR12	Horn	HH	rs799403053T>C-3	T	T
DMR12	Horn	HH	rs210350155C>A	C	C
DMR12	Horn	HH	rs210350155C>A-2	C	C
DMR12	Horn	HH	rs210350155C>A-3	C	C
DMR12	Horn	HH	rs797088784G>A	G	G
DMR12	Horn	HH	rs797088784G>A-3	G	G
DMR12	Horn	HH	rs797088784G>A-4	G	G
DMR12	Horn	HH	rs799920960C>G	C	C
DMR12	Horn	HH	rs799920960C>G-1	C	C
DMR12	Horn	HH	rs383143898_A	G	G
DMR12	Horn	HH	rs383143898_B	C	C
DMR12	Horn	HH	rs383143898_C	G	G
DMR12	Horn	HH	rs383143898_D	C	C
DMR12	Horn	HH	rs801127025_A	A	A
DMR12	Horn	HH	rs801127025_B	A	A
DMR12	Horn	HH	rs801127025_C	A	A
DMR12	Horn	HH	rs801127025_D	A	A
DMR70	Poll	HPc	rs799187101G>A	G	G
DMR70	Poll	HPc	rs799187101G>A-2	G	G
DMR70	Poll	HPc	rs799187101G>A-3	G	G
DMR70	Poll	HPc	rs800947704C>T	C	C
DMR70	Poll	HPc	rs800947704C>T-2	C	C
DMR70	Poll	HPc	rs800947704C>T-3	C	C
DMR70	Poll	HPc	rs799403053T>C	T	T
DMR70	Poll	HPc	rs799403053T>C-2	T	T
DMR70	Poll	HPc	rs799403053T>C-3	T	T
DMR70	Poll	HPc	rs210350155C>A	C	C
DMR70	Poll	HPc	rs210350155C>A-2	C	C
DMR70	Poll	HPc	rs210350155C>A-3	C	C
DMR70	Poll	HPc	rs797088784G>A	G	G
DMR70	Poll	HPc	rs797088784G>A-3	G	G
DMR70	Poll	HPc	rs797088784G>A-4	G	G
DMR70	Poll	HPc	rs799920960C>G	C	C
DMR70	Poll	HPc	rs799920960C>G-1	C	C
DMR70	Poll	HPc	rs383143898_A	T	G
DMR70	Poll	HPc	rs383143898_B	T	C
DMR70	Poll	HPc	rs383143898_C	T	G
DMR70	Poll	HPc	rs383143898_D	T	C
DMR70	Poll	HPc	rs801127025_A	A	A
DMR70	Poll	HPc	rs801127025_B	A	A
DMR70	Poll	HPc	rs801127025_C	A	A
DMR70	Poll	HPc	rs801127025_D	A	A
DMR13	Horn	HH	rs799187101G>A	G	G
DMR13	Horn	HH	rs799187101G>A-2	G	G
DMR13	Horn	HH	rs799187101G>A-3	G	G
DMR13	Horn	HH	rs800947704C>T	C	C
DMR13	Horn	HH	rs800947704C>T-2	C	C
DMR13	Horn	HH	rs800947704C>T-3	C	C
DMR13	Horn	HH	rs799403053T>C	T	T
DMR13	Horn	HH	rs799403053T>C-2	T	T
DMR13	Horn	HH	rs799403053T>C-3	T	T
DMR13	Horn	HH	rs210350155C>A	C	C
DMR13	Horn	HH	rs210350155C>A-2	C	C
DMR13	Horn	HH	rs210350155C>A-3	C	C
DMR13	Horn	HH	rs797088784G>A	G	G
DMR13	Horn	HH	rs797088784G>A-3	G	G
DMR13	Horn	HH	rs797088784G>A-4	G	G
DMR13	Horn	HH	rs799920960C>G	C	C
DMR13	Horn	HH	rs799920960C>G-1	C	C
DMR13	Horn	HH	rs383143898_A	G	G
DMR13	Horn	HH	rs383143898_B	C	C
DMR13	Horn	HH	rs383143898_C	G	G
DMR13	Horn	HH	rs383143898_D	C	C
DMR13	Horn	HH	rs801127025_A	A	A
DMR13	Horn	HH	rs801127025_B	A	A
DMR13	Horn	HH	rs801127025_C	A	A
DMR13	Horn	HH	rs801127025_D	A	A
DMR71	Poll	PcPc	rs799187101G>A	G	G
DMR71	Poll	PcPc	rs799187101G>A-2	G	G
DMR71	Poll	PcPc	rs799187101G>A-3	G	G
DMR71	Poll	PcPc	rs800947704C>T	C	C
DMR71	Poll	PcPc	rs800947704C>T-2	C	C
DMR71	Poll	PcPc	rs800947704C>T-3	C	C
DMR71	Poll	PcPc	rs799403053T>C	T	T
DMR71	Poll	PcPc	rs799403053T>C-2	T	T
DMR71	Poll	PcPc	rs799403053T>C-3	T	T
DMR71	Poll	PcPc	rs210350155C>A	C	C
DMR71	Poll	PcPc	rs210350155C>A-2	C	C
DMR71	Poll	PcPc	rs210350155C>A-3	C	C
DMR71	Poll	PcPc	rs797088784G>A	G	G
DMR71	Poll	PcPc	rs797088784G>A-3	G	G
DMR71	Poll	PcPc	rs797088784G>A-4	G	G
DMR71	Poll	PcPc	rs799920960C>G	C	C
DMR71	Poll	PcPc	rs799920960C>G-1	C	C
DMR71	Poll	PcPc	rs383143898_A	T	T
DMR71	Poll	PcPc	rs383143898_B	T	T
DMR71	Poll	PcPc	rs383143898_C	T	T
DMR71	Poll	PcPc	rs383143898_D	T	T
DMR71	Poll	PcPc	rs801127025_A	A	A
DMR71	Poll	PcPc	rs801127025_B	A	A
DMR71	Poll	PcPc	rs801127025_C	A	A
DMR71	Poll	PcPc	rs801127025_D	A	A
DMR113	Scur	HPc	rs799187101G>A	G	G
DMR113	Scur	HPc	rs799187101G>A-2	G	G
DMR113	Scur	HPc	rs799187101G>A-3	G	G
DMR113	Scur	HPc	rs800947704C>T	C	C
DMR113	Scur	HPc	rs800947704C>T-2	C	C
DMR113	Scur	HPc	rs800947704C>T-3	C	C
DMR113	Scur	HPc	rs799403053T>C	T	T
DMR113	Scur	HPc	rs799403053T>C-2	T	T
DMR113	Scur	HPc	rs799403053T>C-3	T	T
DMR113	Scur	HPc	rs210350155C>A	C	C
DMR113	Scur	HPc	rs210350155C>A-2	C	C
DMR113	Scur	HPc	rs210350155C>A-3	C	C
DMR113	Scur	HPc	rs797088784G>A	G	G
DMR113	Scur	HPc	rs797088784G>A-3	G	G
DMR113	Scur	HPc	rs797088784G>A-4	G	G
DMR113	Scur	HPc	rs799920960C>G	C	C
DMR113	Scur	HPc	rs799920960C>G-1	C	C
DMR113	Scur	HPc	rs383143898_A	T	G
DMR113	Scur	HPc	rs383143898_B	T	C
DMR113	Scur	HPc	rs383143898_C	T	G
DMR113	Scur	HPc	rs383143898_D	T	C
DMR113	Scur	HPc	rs801127025_A	A	A
DMR113	Scur	HPc	rs801127025_B	A	A
DMR113	Scur	HPc	rs801127025_C	A	A
DMR113	Scur	HPc	rs801127025_D	A	A
DMR114	Scur	HPc	rs799187101G>A	G	G
DMR114	Scur	HPc	rs799187101G>A-2	G	G
DMR114	Scur	HPc	rs799187101G>A-3	G	G
DMR114	Scur	HPc	rs800947704C>T	C	C
DMR114	Scur	HPc	rs800947704C>T-2	C	C
DMR114	Scur	HPc	rs800947704C>T-3	C	C
DMR114	Scur	HPc	rs799403053T>C	T	T
DMR114	Scur	HPc	rs799403053T>C-2	T	T
DMR114	Scur	HPc	rs799403053T>C-3	T	T
DMR114	Scur	HPc	rs210350155C>A	C	C
DMR114	Scur	HPc	rs210350155C>A-2	C	C
DMR114	Scur	HPc	rs210350155C>A-3	C	C
DMR114	Scur	HPc	rs797088784G>A	G	G
DMR114	Scur	HPc	rs797088784G>A-3	G	G
DMR114	Scur	HPc	rs797088784G>A-4	G	G
DMR114	Scur	HPc	rs799920960C>G	C	C
DMR114	Scur	HPc	rs799920960C>G-1	C	C
DMR114	Scur	HPc	rs383143898_A	T	G
DMR114	Scur	HPc	rs383143898_B	T	C
DMR114	Scur	HPc	rs383143898_C	T	G
DMR114	Scur	HPc	rs383143898_D	T	C
DMR114	Scur	HPc	rs801127025_A	A	A
DMR114	Scur	HPc	rs801127025_B	A	A
DMR114	Scur	HPc	rs801127025_C	A	A
DMR114	Scur	HPc	rs801127025_D	A	A
DMR14	Horn	HH	rs799187101G>A	G	G
DMR14	Horn	HH	rs799187101G>A-2	G	G
DMR14	Horn	HH	rs799187101G>A-3	G	G
DMR14	Horn	HH	rs800947704C>T	C	C
DMR14	Horn	HH	rs800947704C>T-2	C	C
DMR14	Horn	HH	rs800947704C>T-3	C	C
DMR14	Horn	HH	rs799403053T>C	T	T
DMR14	Horn	HH	rs799403053T>C-2	T	T
DMR14	Horn	HH	rs799403053T>C-3	T	T
DMR14	Horn	HH	rs210350155C>A	C	C
DMR14	Horn	HH	rs210350155C>A-2	C	C
DMR14	Horn	HH	rs210350155C>A-3	C	C
DMR14	Horn	HH	rs797088784G>A	G	G
DMR14	Horn	HH	rs797088784G>A-3	G	G
DMR14	Horn	HH	rs797088784G>A-4	G	G
DMR14	Horn	HH	rs799920960C>G	C	C
DMR14	Horn	HH	rs799920960C>G-1	C	C
DMR14	Horn	HH	rs383143898_A	G	G
DMR14	Horn	HH	rs383143898_B	C	C
DMR14	Horn	HH	rs383143898_C	G	G
DMR14	Horn	HH	rs383143898_D	C	C
DMR14	Horn	HH	rs801127025_A	A	A
DMR14	Horn	HH	rs801127025_B	A	A
DMR14	Horn	HH	rs801127025_C	A	A
DMR14	Horn	HH	rs801127025_D	A	A
DMR115	Scur	HPc	rs799187101G>A	G	G
DMR115	Scur	HPc	rs799187101G>A-2	G	G
DMR115	Scur	HPc	rs799187101G>A-3	G	G
DMR115	Scur	HPc	rs800947704C>T	C	C
DMR115	Scur	HPc	rs800947704C>T-2	C	C
DMR115	Scur	HPc	rs800947704C>T-3	C	C
DMR115	Scur	HPc	rs799403053T>C	T	T
DMR115	Scur	HPc	rs799403053T>C-2	T	T
DMR115	Scur	HPc	rs799403053T>C-3	T	T
DMR115	Scur	HPc	rs210350155C>A	C	C
DMR115	Scur	HPc	rs210350155C>A-2	C	C
DMR115	Scur	HPc	rs210350155C>A-3	C	C
DMR115	Scur	HPc	rs797088784G>A	G	G
DMR115	Scur	HPc	rs797088784G>A-3	G	G
DMR115	Scur	HPc	rs797088784G>A-4	G	G
DMR115	Scur	HPc	rs799920960C>G	C	C
DMR115	Scur	HPc	rs799920960C>G-1	C	C
DMR115	Scur	HPc	rs383143898_A	T	G
DMR115	Scur	HPc	rs383143898_B	T	C
DMR115	Scur	HPc	rs383143898_C	T	G
DMR115	Scur	HPc	rs383143898_D	T	C
DMR115	Scur	HPc	rs801127025_A	A	A
DMR115	Scur	HPc	rs801127025_B	A	A
DMR115	Scur	HPc	rs801127025_C	A	A
DMR115	Scur	HPc	rs801127025_D	A	A
DMR116	Scur	HPc	rs799187101G>A	G	G
DMR116	Scur	HPc	rs799187101G>A-2	G	G
DMR116	Scur	HPc	rs799187101G>A-3	G	G
DMR116	Scur	HPc	rs800947704C>T	C	C
DMR116	Scur	HPc	rs800947704C>T-2	C	C
DMR116	Scur	HPc	rs800947704C>T-3	C	C
DMR116	Scur	HPc	rs799403053T>C	T	T
DMR116	Scur	HPc	rs799403053T>C-2	T	T
DMR116	Scur	HPc	rs799403053T>C-3	T	T
DMR116	Scur	HPc	rs210350155C>A	C	C
DMR116	Scur	HPc	rs210350155C>A-2	C	C
DMR116	Scur	HPc	rs210350155C>A-3	C	C
DMR116	Scur	HPc	rs797088784G>A	G	G
DMR116	Scur	HPc	rs797088784G>A-3	G	G
DMR116	Scur	HPc	rs797088784G>A-4	G	G
DMR116	Scur	HPc	rs799920960C>G	C	C
DMR116	Scur	HPc	rs799920960C>G-1	C	C
DMR116	Scur	HPc	rs383143898_A	T	G
DMR116	Scur	HPc	rs383143898_B	T	C
DMR116	Scur	HPc	rs383143898_C	T	G
DMR116	Scur	HPc	rs383143898_D	T	C
DMR116	Scur	HPc	rs801127025_A	A	A
DMR116	Scur	HPc	rs801127025_B	A	A
DMR116	Scur	HPc	rs801127025_C	A	A
DMR116	Scur	HPc	rs801127025_D	A	A
DMR72	Poll	PcPc	rs799187101G>A	G	G
DMR72	Poll	PcPc	rs799187101G>A-2	G	G
DMR72	Poll	PcPc	rs799187101G>A-3	G	G
DMR72	Poll	PcPc	rs800947704C>T	C	C
DMR72	Poll	PcPc	rs800947704C>T-2	C	C
DMR72	Poll	PcPc	rs800947704C>T-3	C	C
DMR72	Poll	PcPc	rs799403053T>C	T	T
DMR72	Poll	PcPc	rs799403053T>C-2	T	T
DMR72	Poll	PcPc	rs799403053T>C-3	T	T
DMR72	Poll	PcPc	rs210350155C>A	C	C
DMR72	Poll	PcPc	rs210350155C>A-2	C	C
DMR72	Poll	PcPc	rs210350155C>A-3	C	C
DMR72	Poll	PcPc	rs797088784G>A	G	G
DMR72	Poll	PcPc	rs797088784G>A-3	G	G
DMR72	Poll	PcPc	rs797088784G>A-4	G	G
DMR72	Poll	PcPc	rs799920960C>G	C	C
DMR72	Poll	PcPc	rs799920960C>G-1	C	C
DMR72	Poll	PcPc	rs383143898_A	T	T
DMR72	Poll	PcPc	rs383143898_B	T	T
DMR72	Poll	PcPc	rs383143898_C	T	T
DMR72	Poll	PcPc	rs383143898_D	T	T
DMR72	Poll	PcPc	rs801127025_A	A	A
DMR72	Poll	PcPc	rs801127025_B	A	A
DMR72	Poll	PcPc	rs801127025_C	A	A
DMR72	Poll	PcPc	rs801127025_D	A	A
DMR73	Poll	PcPc	rs799187101G>A	G	G
DMR73	Poll	PcPc	rs799187101G>A-2	G	G
DMR73	Poll	PcPc	rs799187101G>A-3	G	G
DMR73	Poll	PcPc	rs800947704C>T	C	C
DMR73	Poll	PcPc	rs800947704C>T-2	C	C
DMR73	Poll	PcPc	rs800947704C>T-3	C	C
DMR73	Poll	PcPc	rs799403053T>C	T	T
DMR73	Poll	PcPc	rs799403053T>C-2	T	T
DMR73	Poll	PcPc	rs799403053T>C-3	T	T
DMR73	Poll	PcPc	rs210350155C>A	C	C
DMR73	Poll	PcPc	rs210350155C>A-2	C	C
DMR73	Poll	PcPc	rs210350155C>A-3	C	C
DMR73	Poll	PcPc	rs797088784G>A	G	G
DMR73	Poll	PcPc	rs797088784G>A-3	G	G
DMR73	Poll	PcPc	rs797088784G>A-4	G	G
DMR73	Poll	PcPc	rs799920960C>G	C	C
DMR73	Poll	PcPc	rs799920960C>G-1	C	C
DMR73	Poll	PcPc	rs383143898_A	T	T
DMR73	Poll	PcPc	rs383143898_B	T	T
DMR73	Poll	PcPc	rs383143898_C	T	T
DMR73	Poll	PcPc	rs383143898_D	T	T
DMR73	Poll	PcPc	rs801127025_A	A	A
DMR73	Poll	PcPc	rs801127025_B	A	A
DMR73	Poll	PcPc	rs801127025_C	A	A
DMR73	Poll	PcPc	rs801127025_D	A	A
DMR117	Scur	HPc	rs799187101G>A	G	G
DMR117	Scur	HPc	rs799187101G>A-2	G	G
DMR117	Scur	HPc	rs799187101G>A-3	G	G
DMR117	Scur	HPc	rs800947704C>T	C	C
DMR117	Scur	HPc	rs800947704C>T-2	C	C
DMR117	Scur	HPc	rs800947704C>T-3	C	C
DMR117	Scur	HPc	rs799403053T>C	T	T
DMR117	Scur	HPc	rs799403053T>C-2	T	T
DMR117	Scur	HPc	rs799403053T>C-3	T	T
DMR117	Scur	HPc	rs210350155C>A	C	C
DMR117	Scur	HPc	rs210350155C>A-2	C	C
DMR117	Scur	HPc	rs210350155C>A-3	C	C
DMR117	Scur	HPc	rs797088784G>A	G	G
DMR117	Scur	HPc	rs797088784G>A-3	G	G
DMR117	Scur	HPc	rs797088784G>A-4	G	G
DMR117	Scur	HPc	rs799920960C>G	C	C
DMR117	Scur	HPc	rs799920960C>G-1	C	C
DMR117	Scur	HPc	rs383143898_A	T	G
DMR117	Scur	HPc	rs383143898_B	T	C
DMR117	Scur	HPc	rs383143898_C	T	G
DMR117	Scur	HPc	rs383143898_D	T	C
DMR117	Scur	HPc	rs801127025_A	A	A
DMR117	Scur	HPc	rs801127025_B	A	A
DMR117	Scur	HPc	rs801127025_C	A	A
DMR117	Scur	HPc	rs801127025_D	A	A
DMR112	Scur	HPc	rs799187101G>A	G	G
DMR112	Scur	HPc	rs799187101G>A-2	G	G
DMR112	Scur	HPc	rs799187101G>A-3	G	G
DMR112	Scur	HPc	rs800947704C>T	C	C
DMR112	Scur	HPc	rs800947704C>T-2	C	C
DMR112	Scur	HPc	rs800947704C>T-3	C	C
DMR112	Scur	HPc	rs799403053T>C	T	T
DMR112	Scur	HPc	rs799403053T>C-2	T	T
DMR112	Scur	HPc	rs799403053T>C-3	T	T
DMR112	Scur	HPc	rs210350155C>A	C	C
DMR112	Scur	HPc	rs210350155C>A-2	C	C
DMR112	Scur	HPc	rs210350155C>A-3	C	C
DMR112	Scur	HPc	rs797088784G>A	G	G
DMR112	Scur	HPc	rs797088784G>A-3	G	G
DMR112	Scur	HPc	rs797088784G>A-4	G	G
DMR112	Scur	HPc	rs799920960C>G	C	C
DMR112	Scur	HPc	rs799920960C>G-1	C	C
DMR112	Scur	HPc	rs383143898_A	T	G
DMR112	Scur	HPc	rs383143898_B	T	C
DMR112	Scur	HPc	rs383143898_C	T	G
DMR112	Scur	HPc	rs383143898_D	T	C
DMR112	Scur	HPc	rs801127025_A	A	A
DMR112	Scur	HPc	rs801127025_B	A	A
DMR112	Scur	HPc	rs801127025_C	A	A
DMR112	Scur	HPc	rs801127025_D	A	A
DMR111	Scur	HPc	rs799187101G>A	G	G
DMR111	Scur	HPc	rs799187101G>A-2	G	G
DMR111	Scur	HPc	rs799187101G>A-3	G	G
DMR111	Scur	HPc	rs800947704C>T	C	C
DMR111	Scur	HPc	rs800947704C>T-2	C	C
DMR111	Scur	HPc	rs800947704C>T-3	C	C
DMR111	Scur	HPc	rs799403053T>C	T	T
DMR111	Scur	HPc	rs799403053T>C-2	T	T
DMR111	Scur	HPc	rs799403053T>C-3	T	T
DMR111	Scur	HPc	rs210350155C>A	C	C
DMR111	Scur	HPc	rs210350155C>A-2	C	C
DMR111	Scur	HPc	rs210350155C>A-3	C	C
DMR111	Scur	HPc	rs797088784G>A	G	G
DMR111	Scur	HPc	rs797088784G>A-3	G	G
DMR111	Scur	HPc	rs797088784G>A-4	G	G
DMR111	Scur	HPc	rs799920960C>G	C	C
DMR111	Scur	HPc	rs799920960C>G-1	C	C
DMR111	Scur	HPc	rs383143898_A	T	G
DMR111	Scur	HPc	rs383143898_B	T	C
DMR111	Scur	HPc	rs383143898_C	T	G
DMR111	Scur	HPc	rs383143898_D	T	C
DMR111	Scur	HPc	rs801127025_A	A	A
DMR111	Scur	HPc	rs801127025_B	A	A
DMR111	Scur	HPc	rs801127025_C	A	A
DMR111	Scur	HPc	rs801127025_D	A	A
XBD1	Horn	HH	rs799187101G>A	G	G
XBD1	Horn	HH	rs799187101G>A-2	G	G
XBD1	Horn	HH	rs799187101G>A-3	G	G
XBD1	Horn	HH	rs800947704C>T	C	C
XBD1	Horn	HH	rs800947704C>T-2	C	C
XBD1	Horn	HH	rs800947704C>T-3	C	C
XBD1	Horn	HH	rs799403053T>C	T	T
XBD1	Horn	HH	rs799403053T>C-2	T	T
XBD1	Horn	HH	rs799403053T>C-3	T	T
XBD1	Horn	HH	rs210350155C>A	C	C
XBD1	Horn	HH	rs210350155C>A-2	C	C
XBD1	Horn	HH	rs210350155C>A-3	C	C
XBD1	Horn	HH	rs797088784G>A	G	G
XBD1	Horn	HH	rs797088784G>A-3	G	G
XBD1	Horn	HH	rs797088784G>A-4	G	G
XBD1	Horn	HH	rs799920960C>G	C	C
XBD1	Horn	HH	rs799920960C>G-1	C	C
XBD1	Horn	HH	rs383143898_A	G	G
XBD1	Horn	HH	rs383143898_B	C	C
XBD1	Horn	HH	rs383143898_C	G	G
XBD1	Horn	HH	rs383143898_D	C	C
XBD1	Horn	HH	rs801127025_A	A	A
XBD1	Horn	HH	rs801127025_B	A	A
XBD1	Horn	HH	rs801127025_C	A	A
XBD1	Horn	HH	rs801127025_D	A	A
DMR95	Scur	HPc	rs799187101G>A	G	G
DMR95	Scur	HPc	rs799187101G>A-2	G	G
DMR95	Scur	HPc	rs799187101G>A-3	G	G
DMR95	Scur	HPc	rs800947704C>T	C	C
DMR95	Scur	HPc	rs800947704C>T-2	C	C
DMR95	Scur	HPc	rs800947704C>T-3	C	C
DMR95	Scur	HPc	rs799403053T>C	T	T
DMR95	Scur	HPc	rs799403053T>C-2	T	T
DMR95	Scur	HPc	rs799403053T>C-3	T	T
DMR95	Scur	HPc	rs210350155C>A	C	C
DMR95	Scur	HPc	rs210350155C>A-2	C	C
DMR95	Scur	HPc	rs210350155C>A-3	C	C
DMR95	Scur	HPc	rs797088784G>A	G	G
DMR95	Scur	HPc	rs797088784G>A-3	G	G
DMR95	Scur	HPc	rs797088784G>A-4	G	G
DMR95	Scur	HPc	rs799920960C>G	C	C
DMR95	Scur	HPc	rs799920960C>G-1	C	C
DMR95	Scur	HPc	rs383143898_A	T	G
DMR95	Scur	HPc	rs383143898_B	T	C
DMR95	Scur	HPc	rs383143898_C	T	G
DMR95	Scur	HPc	rs383143898_D	T	C
DMR95	Scur	HPc	rs801127025_A	A	A
DMR95	Scur	HPc	rs801127025_B	A	A
DMR95	Scur	HPc	rs801127025_C	A	A
DMR95	Scur	HPc	rs801127025_D	A	A
DMR28	Poll	HPc	rs799187101G>A	G	G
DMR28	Poll	HPc	rs799187101G>A-2	G	G
DMR28	Poll	HPc	rs799187101G>A-3	G	G
DMR28	Poll	HPc	rs800947704C>T	C	C
DMR28	Poll	HPc	rs800947704C>T-2	C	C
DMR28	Poll	HPc	rs800947704C>T-3	C	C
DMR28	Poll	HPc	rs799403053T>C	T	T
DMR28	Poll	HPc	rs799403053T>C-2	T	T
DMR28	Poll	HPc	rs799403053T>C-3	T	T
DMR28	Poll	HPc	rs210350155C>A	C	C
DMR28	Poll	HPc	rs210350155C>A-2	C	C
DMR28	Poll	HPc	rs210350155C>A-3	C	C
DMR28	Poll	HPc	rs797088784G>A	G	G
DMR28	Poll	HPc	rs797088784G>A-3	G	G
DMR28	Poll	HPc	rs797088784G>A-4	G	G
DMR28	Poll	HPc	rs799920960C>G	C	C
DMR28	Poll	HPc	rs799920960C>G-1	C	C
DMR28	Poll	HPc	rs383143898_A	T	G
DMR28	Poll	HPc	rs383143898_B	T	C
DMR28	Poll	HPc	rs383143898_C	T	G
DMR28	Poll	HPc	rs383143898_D	T	C
DMR28	Poll	HPc	rs801127025_A	A	A
DMR28	Poll	HPc	rs801127025_B	A	A
DMR28	Poll	HPc	rs801127025_C	A	A
DMR28	Poll	HPc	rs801127025_D	A	A
DMR29	Poll	PcPc	rs799187101G>A	G	G
DMR29	Poll	PcPc	rs799187101G>A-2	G	G
DMR29	Poll	PcPc	rs799187101G>A-3	G	G
DMR29	Poll	PcPc	rs800947704C>T	C	C
DMR29	Poll	PcPc	rs800947704C>T-2	C	C
DMR29	Poll	PcPc	rs800947704C>T-3	C	C
DMR29	Poll	PcPc	rs799403053T>C	T	T
DMR29	Poll	PcPc	rs799403053T>C-2	T	T
DMR29	Poll	PcPc	rs799403053T>C-3	T	T
DMR29	Poll	PcPc	rs210350155C>A	C	C
DMR29	Poll	PcPc	rs210350155C>A-2	C	C
DMR29	Poll	PcPc	rs210350155C>A-3	C	C
DMR29	Poll	PcPc	rs797088784G>A	G	G
DMR29	Poll	PcPc	rs797088784G>A-3	G	G
DMR29	Poll	PcPc	rs797088784G>A-4	G	G
DMR29	Poll	PcPc	rs799920960C>G	C	C
DMR29	Poll	PcPc	rs799920960C>G-1	C	C
DMR29	Poll	PcPc	rs383143898_A	T	T
DMR29	Poll	PcPc	rs383143898_B	T	T
DMR29	Poll	PcPc	rs383143898_C	T	T
DMR29	Poll	PcPc	rs383143898_D	T	T
DMR29	Poll	PcPc	rs801127025_A	A	A
DMR29	Poll	PcPc	rs801127025_B	A	A
DMR29	Poll	PcPc	rs801127025_C	A	A
DMR29	Poll	PcPc	rs801127025_D	A	A
DMR96	Scur	HPc	rs799187101G>A	G	G
DMR96	Scur	HPc	rs799187101G>A-2	G	G
DMR96	Scur	HPc	rs799187101G>A-3	G	G
DMR96	Scur	HPc	rs800947704C>T	C	C
DMR96	Scur	HPc	rs800947704C>T-2	C	C
DMR96	Scur	HPc	rs800947704C>T-3	C	C
DMR96	Scur	HPc	rs799403053T>C	T	T
DMR96	Scur	HPc	rs799403053T>C-2	T	T
DMR96	Scur	HPc	rs799403053T>C-3	T	T
DMR96	Scur	HPc	rs210350155C>A	C	C
DMR96	Scur	HPc	rs210350155C>A-2	C	C
DMR96	Scur	HPc	rs210350155C>A-3	C	C
DMR96	Scur	HPc	rs797088784G>A	G	G
DMR96	Scur	HPc	rs797088784G>A-3	G	G
DMR96	Scur	HPc	rs797088784G>A-4	G	G
DMR96	Scur	HPc	rs799920960C>G	C	C
DMR96	Scur	HPc	rs799920960C>G-1	C	C
DMR96	Scur	HPc	rs383143898_A	T	G
DMR96	Scur	HPc	rs383143898_B	T	C
DMR96	Scur	HPc	rs383143898_C	T	G
DMR96	Scur	HPc	rs383143898_D	T	C
DMR96	Scur	HPc	rs801127025_A	A	A
DMR96	Scur	HPc	rs801127025_B	A	A
DMR96	Scur	HPc	rs801127025_C	A	A
DMR96	Scur	HPc	rs801127025_D	A	A
DMR30	Poll	PcPc	rs799187101G>A	G	G
DMR30	Poll	PcPc	rs799187101G>A-2	G	G
DMR30	Poll	PcPc	rs799187101G>A-3	G	G
DMR30	Poll	PcPc	rs800947704C>T	C	C
DMR30	Poll	PcPc	rs800947704C>T-2	C	C
DMR30	Poll	PcPc	rs800947704C>T-3	C	C
DMR30	Poll	PcPc	rs799403053T>C	T	T
DMR30	Poll	PcPc	rs799403053T>C-2	T	T
DMR30	Poll	PcPc	rs799403053T>C-3	T	T
DMR30	Poll	PcPc	rs210350155C>A	C	C
DMR30	Poll	PcPc	rs210350155C>A-2	C	C
DMR30	Poll	PcPc	rs210350155C>A-3	C	C
DMR30	Poll	PcPc	rs797088784G>A	G	G
DMR30	Poll	PcPc	rs797088784G>A-3	G	G
DMR30	Poll	PcPc	rs797088784G>A-4	G	G
DMR30	Poll	PcPc	rs799920960C>G	C	C
DMR30	Poll	PcPc	rs799920960C>G-1	C	C
DMR30	Poll	PcPc	rs383143898_A	T	T
DMR30	Poll	PcPc	rs383143898_B	T	T
DMR30	Poll	PcPc	rs383143898_C	T	T
DMR30	Poll	PcPc	rs383143898_D	T	T
DMR30	Poll	PcPc	rs801127025_A	A	A
DMR30	Poll	PcPc	rs801127025_B	A	A
DMR30	Poll	PcPc	rs801127025_C	A	A
DMR30	Poll	PcPc	rs801127025_D	A	A
DMR31	Poll	HPc	rs799187101G>A	G	G
DMR31	Poll	HPc	rs799187101G>A-2	G	G
DMR31	Poll	HPc	rs799187101G>A-3	G	G
DMR31	Poll	HPc	rs800947704C>T	C	C
DMR31	Poll	HPc	rs800947704C>T-2	C	C
DMR31	Poll	HPc	rs800947704C>T-3	C	C
DMR31	Poll	HPc	rs799403053T>C	T	T
DMR31	Poll	HPc	rs799403053T>C-2	T	T
DMR31	Poll	HPc	rs799403053T>C-3	T	T
DMR31	Poll	HPc	rs210350155C>A	C	C
DMR31	Poll	HPc	rs210350155C>A-2	C	C
DMR31	Poll	HPc	rs210350155C>A-3	C	C
DMR31	Poll	HPc	rs797088784G>A	G	G
DMR31	Poll	HPc	rs797088784G>A-3	G	G
DMR31	Poll	HPc	rs797088784G>A-4	G	G
DMR31	Poll	HPc	rs799920960C>G	C	C
DMR31	Poll	HPc	rs799920960C>G-1	C	C
DMR31	Poll	HPc	rs383143898_A	T	G
DMR31	Poll	HPc	rs383143898_B	T	C
DMR31	Poll	HPc	rs383143898_C	T	G
DMR31	Poll	HPc	rs383143898_D	T	C
DMR31	Poll	HPc	rs801127025_A	A	A
DMR31	Poll	HPc	rs801127025_B	A	A
DMR31	Poll	HPc	rs801127025_C	A	A
DMR31	Poll	HPc	rs801127025_D	A	A
DMR32	Poll	PcPc	rs799187101G>A	G	G
DMR32	Poll	PcPc	rs799187101G>A-2	G	G
DMR32	Poll	PcPc	rs799187101G>A-3	G	G
DMR32	Poll	PcPc	rs800947704C>T	C	C
DMR32	Poll	PcPc	rs800947704C>T-2	C	C
DMR32	Poll	PcPc	rs800947704C>T-3	C	C
DMR32	Poll	PcPc	rs799403053T>C	T	T
DMR32	Poll	PcPc	rs799403053T>C-2	T	T
DMR32	Poll	PcPc	rs799403053T>C-3	T	T
DMR32	Poll	PcPc	rs210350155C>A	C	C
DMR32	Poll	PcPc	rs210350155C>A-2	C	C
DMR32	Poll	PcPc	rs210350155C>A-3	C	C
DMR32	Poll	PcPc	rs797088784G>A	G	G
DMR32	Poll	PcPc	rs797088784G>A-3	G	G
DMR32	Poll	PcPc	rs797088784G>A-4	G	G
DMR32	Poll	PcPc	rs799920960C>G	C	C
DMR32	Poll	PcPc	rs799920960C>G-1	C	C
DMR32	Poll	PcPc	rs383143898_A	T	T
DMR32	Poll	PcPc	rs383143898_B	T	T
DMR32	Poll	PcPc	rs383143898_C	T	T
DMR32	Poll	PcPc	rs383143898_D	T	T
DMR32	Poll	PcPc	rs801127025_A	A	A
DMR32	Poll	PcPc	rs801127025_B	A	A
DMR32	Poll	PcPc	rs801127025_C	A	A
DMR32	Poll	PcPc	rs801127025_D	A	A
DMR33	Poll	HPc	rs799187101G>A	G	G
DMR33	Poll	HPc	rs799187101G>A-2	G	G
DMR33	Poll	HPc	rs799187101G>A-3	G	G
DMR33	Poll	HPc	rs800947704C>T	C	C
DMR33	Poll	HPc	rs800947704C>T-2	C	C
DMR33	Poll	HPc	rs800947704C>T-3	C	C
DMR33	Poll	HPc	rs799403053T>C	T	T
DMR33	Poll	HPc	rs799403053T>C-2	T	T
DMR33	Poll	HPc	rs799403053T>C-3	T	T
DMR33	Poll	HPc	rs210350155C>A	C	C
DMR33	Poll	HPc	rs210350155C>A-2	C	C
DMR33	Poll	HPc	rs210350155C>A-3	C	C
DMR33	Poll	HPc	rs797088784G>A	G	G
DMR33	Poll	HPc	rs797088784G>A-3	G	G
DMR33	Poll	HPc	rs797088784G>A-4	G	G
DMR33	Poll	HPc	rs799920960C>G	C	C
DMR33	Poll	HPc	rs799920960C>G-1	C	C
DMR33	Poll	HPc	rs383143898_A	T	G
DMR33	Poll	HPc	rs383143898_B	T	C
DMR33	Poll	HPc	rs383143898_C	T	G
DMR33	Poll	HPc	rs383143898_D	T	C
DMR33	Poll	HPc	rs801127025_A	A	A
DMR33	Poll	HPc	rs801127025_B	A	A
DMR33	Poll	HPc	rs801127025_C	A	A
DMR33	Poll	HPc	rs801127025_D	A	A
DMR1	Horn	HH	rs799187101G>A	G	G
DMR1	Horn	HH	rs799187101G>A-2	G	G
DMR1	Horn	HH	rs799187101G>A-3	G	G
DMR1	Horn	HH	rs800947704C>T	C	C
DMR1	Horn	HH	rs800947704C>T-2	C	C
DMR1	Horn	HH	rs800947704C>T-3	C	C
DMR1	Horn	HH	rs799403053T>C	T	T
DMR1	Horn	HH	rs799403053T>C-2	T	T
DMR1	Horn	HH	rs799403053T>C-3	T	T
DMR1	Horn	HH	rs210350155C>A	C	C
DMR1	Horn	HH	rs210350155C>A-2	C	C
DMR1	Horn	HH	rs210350155C>A-3	C	C
DMR1	Horn	HH	rs797088784G>A	G	G
DMR1	Horn	HH	rs797088784G>A-3	G	G
DMR1	Horn	HH	rs797088784G>A-4	G	G
DMR1	Horn	HH	rs799920960C>G	C	C
DMR1	Horn	HH	rs799920960C>G-1	C	C
DMR1	Horn	HH	rs383143898_A	G	G
DMR1	Horn	HH	rs383143898_B	C	C
DMR1	Horn	HH	rs383143898_C	G	G
DMR1	Horn	HH	rs383143898_D	C	C
DMR1	Horn	HH	rs801127025_A	A	A
DMR1	Horn	HH	rs801127025_B	A	A
DMR1	Horn	HH	rs801127025_C	A	A
DMR1	Horn	HH	rs801127025_D	A	A
DMR34	Poll	PcPc	rs799187101G>A	G	G
DMR34	Poll	PcPc	rs799187101G>A-2	G	G
DMR34	Poll	PcPc	rs799187101G>A-3	G	G
DMR34	Poll	PcPc	rs800947704C>T	C	C
DMR34	Poll	PcPc	rs800947704C>T-2	C	C
DMR34	Poll	PcPc	rs800947704C>T-3	C	C
DMR34	Poll	PcPc	rs799403053T>C	T	T
DMR34	Poll	PcPc	rs799403053T>C-2	T	T
DMR34	Poll	PcPc	rs799403053T>C-3	T	T
DMR34	Poll	PcPc	rs210350155C>A	C	C
DMR34	Poll	PcPc	rs210350155C>A-2	C	C
DMR34	Poll	PcPc	rs210350155C>A-3	C	C
DMR34	Poll	PcPc	rs797088784G>A	G	G
DMR34	Poll	PcPc	rs797088784G>A-3	G	G
DMR34	Poll	PcPc	rs797088784G>A-4	G	G
DMR34	Poll	PcPc	rs799920960C>G	C	C
DMR34	Poll	PcPc	rs799920960C>G-1	C	C
DMR34	Poll	PcPc	rs383143898_A	T	T
DMR34	Poll	PcPc	rs383143898_B	T	T
DMR34	Poll	PcPc	rs383143898_C	T	T
DMR34	Poll	PcPc	rs383143898_D	T	T
DMR34	Poll	PcPc	rs801127025_A	A	A
DMR34	Poll	PcPc	rs801127025_B	A	A
DMR34	Poll	PcPc	rs801127025_C	A	A
DMR34	Poll	PcPc	rs801127025_D	A	A
DMR97	Scur	HPc	rs799187101G>A	G	G
DMR97	Scur	HPc	rs799187101G>A-2	G	G
DMR97	Scur	HPc	rs799187101G>A-3	G	G
DMR97	Scur	HPc	rs800947704C>T	C	C
DMR97	Scur	HPc	rs800947704C>T-2	C	C
DMR97	Scur	HPc	rs800947704C>T-3	C	C
DMR97	Scur	HPc	rs799403053T>C	T	T
DMR97	Scur	HPc	rs799403053T>C-2	T	T
DMR97	Scur	HPc	rs799403053T>C-3	T	T
DMR97	Scur	HPc	rs210350155C>A	C	C
DMR97	Scur	HPc	rs210350155C>A-2	C	C
DMR97	Scur	HPc	rs210350155C>A-3	C	C
DMR97	Scur	HPc	rs797088784G>A	G	G
DMR97	Scur	HPc	rs797088784G>A-3	G	G
DMR97	Scur	HPc	rs797088784G>A-4	G	G
DMR97	Scur	HPc	rs799920960C>G	C	C
DMR97	Scur	HPc	rs799920960C>G-1	C	C
DMR97	Scur	HPc	rs383143898_A	T	G
DMR97	Scur	HPc	rs383143898_B	T	C
DMR97	Scur	HPc	rs383143898_C	T	G
DMR97	Scur	HPc	rs383143898_D	T	C
DMR97	Scur	HPc	rs801127025_A	A	A
DMR97	Scur	HPc	rs801127025_B	A	A
DMR97	Scur	HPc	rs801127025_C	A	A
DMR97	Scur	HPc	rs801127025_D	A	A
DMR98	Scur	HPc	rs799187101G>A	G	G
DMR98	Scur	HPc	rs799187101G>A-2	G	G
DMR98	Scur	HPc	rs799187101G>A-3	G	G
DMR98	Scur	HPc	rs800947704C>T	C	C
DMR98	Scur	HPc	rs800947704C>T-2	C	C
DMR98	Scur	HPc	rs800947704C>T-3	C	C
DMR98	Scur	HPc	rs799403053T>C	T	T
DMR98	Scur	HPc	rs799403053T>C-2	T	T
DMR98	Scur	HPc	rs799403053T>C-3	T	T
DMR98	Scur	HPc	rs210350155C>A	C	C
DMR98	Scur	HPc	rs210350155C>A-2	C	C
DMR98	Scur	HPc	rs210350155C>A-3	C	C
DMR98	Scur	HPc	rs797088784G>A	G	G
DMR98	Scur	HPc	rs797088784G>A-3	G	G
DMR98	Scur	HPc	rs797088784G>A-4	G	G
DMR98	Scur	HPc	rs799920960C>G	C	C
DMR98	Scur	HPc	rs799920960C>G-1	C	C
DMR98	Scur	HPc	rs383143898_A	T	G
DMR98	Scur	HPc	rs383143898_B	T	C
DMR98	Scur	HPc	rs383143898_C	T	G
DMR98	Scur	HPc	rs383143898_D	T	C
DMR98	Scur	HPc	rs801127025_A	A	A
DMR98	Scur	HPc	rs801127025_B	A	A
DMR98	Scur	HPc	rs801127025_C	A	A
DMR98	Scur	HPc	rs801127025_D	A	A
DMR99	Scur	HPc	rs799187101G>A	G	G
DMR99	Scur	HPc	rs799187101G>A-2	G	G
DMR99	Scur	HPc	rs799187101G>A-3	G	G
DMR99	Scur	HPc	rs800947704C>T	C	C
DMR99	Scur	HPc	rs800947704C>T-2	C	C
DMR99	Scur	HPc	rs800947704C>T-3	C	C
DMR99	Scur	HPc	rs799403053T>C	T	T
DMR99	Scur	HPc	rs799403053T>C-2	T	T
DMR99	Scur	HPc	rs799403053T>C-3	T	T
DMR99	Scur	HPc	rs210350155C>A	C	C
DMR99	Scur	HPc	rs210350155C>A-2	C	C
DMR99	Scur	HPc	rs210350155C>A-3	C	C
DMR99	Scur	HPc	rs797088784G>A	G	G
DMR99	Scur	HPc	rs797088784G>A-3	G	G
DMR99	Scur	HPc	rs797088784G>A-4	G	G
DMR99	Scur	HPc	rs799920960C>G	C	C
DMR99	Scur	HPc	rs799920960C>G-1	C	C
DMR99	Scur	HPc	rs383143898_A	T	G
DMR99	Scur	HPc	rs383143898_B	T	C
DMR99	Scur	HPc	rs383143898_C	T	G
DMR99	Scur	HPc	rs383143898_D	T	C
DMR99	Scur	HPc	rs801127025_A	A	A
DMR99	Scur	HPc	rs801127025_B	A	A
DMR99	Scur	HPc	rs801127025_C	A	A
DMR99	Scur	HPc	rs801127025_D	A	A
DMR2	Horn	HH	rs799187101G>A	G	G
DMR2	Horn	HH	rs799187101G>A-2	G	G
DMR2	Horn	HH	rs799187101G>A-3	G	G
DMR2	Horn	HH	rs800947704C>T	C	C
DMR2	Horn	HH	rs800947704C>T-2	C	C
DMR2	Horn	HH	rs800947704C>T-3	C	C
DMR2	Horn	HH	rs799403053T>C	T	T
DMR2	Horn	HH	rs799403053T>C-2	T	T
DMR2	Horn	HH	rs799403053T>C-3	T	T
DMR2	Horn	HH	rs210350155C>A	C	C
DMR2	Horn	HH	rs210350155C>A-2	C	C
DMR2	Horn	HH	rs210350155C>A-3	C	C
DMR2	Horn	HH	rs797088784G>A	G	G
DMR2	Horn	HH	rs797088784G>A-3	G	G
DMR2	Horn	HH	rs797088784G>A-4	G	G
DMR2	Horn	HH	rs799920960C>G	C	C
DMR2	Horn	HH	rs799920960C>G-1	C	C
DMR2	Horn	HH	rs383143898_A	G	G
DMR2	Horn	HH	rs383143898_B	C	C
DMR2	Horn	HH	rs383143898_C	G	G
DMR2	Horn	HH	rs383143898_D	C	C
DMR2	Horn	HH	rs801127025_A	A	A
DMR2	Horn	HH	rs801127025_B	A	A
DMR2	Horn	HH	rs801127025_C	A	A
DMR2	Horn	HH	rs801127025_D	A	A
DMR100	Scur	HPc	rs799187101G>A	G	G
DMR100	Scur	HPc	rs799187101G>A-2	G	G
DMR100	Scur	HPc	rs799187101G>A-3	G	G
DMR100	Scur	HPc	rs800947704C>T	C	C
DMR100	Scur	HPc	rs800947704C>T-2	C	C
DMR100	Scur	HPc	rs800947704C>T-3	C	C
DMR100	Scur	HPc	rs799403053T>C	T	T
DMR100	Scur	HPc	rs799403053T>C-2	T	T
DMR100	Scur	HPc	rs799403053T>C-3	T	T
DMR100	Scur	HPc	rs210350155C>A	C	C
DMR100	Scur	HPc	rs210350155C>A-2	C	C
DMR100	Scur	HPc	rs210350155C>A-3	C	C
DMR100	Scur	HPc	rs797088784G>A	G	G
DMR100	Scur	HPc	rs797088784G>A-3	G	G
DMR100	Scur	HPc	rs797088784G>A-4	G	G
DMR100	Scur	HPc	rs799920960C>G	C	C
DMR100	Scur	HPc	rs799920960C>G-1	C	C
DMR100	Scur	HPc	rs383143898_A	T	G
DMR100	Scur	HPc	rs383143898_B	T	C
DMR100	Scur	HPc	rs383143898_C	T	G
DMR100	Scur	HPc	rs383143898_D	T	C
DMR100	Scur	HPc	rs801127025_A	A	A
DMR100	Scur	HPc	rs801127025_B	A	A
DMR100	Scur	HPc	rs801127025_C	A	A
DMR100	Scur	HPc	rs801127025_D	A	A
DMR41	Poll	HPc	rs799187101G>A	G	G
DMR41	Poll	HPc	rs799187101G>A-2	G	G
DMR41	Poll	HPc	rs799187101G>A-3	G	G
DMR41	Poll	HPc	rs800947704C>T	C	C
DMR41	Poll	HPc	rs800947704C>T-2	C	C
DMR41	Poll	HPc	rs800947704C>T-3	C	C
DMR41	Poll	HPc	rs799403053T>C	T	T
DMR41	Poll	HPc	rs799403053T>C-2	T	T
DMR41	Poll	HPc	rs799403053T>C-3	T	T
DMR41	Poll	HPc	rs210350155C>A	C	C
DMR41	Poll	HPc	rs210350155C>A-2	C	C
DMR41	Poll	HPc	rs210350155C>A-3	C	C
DMR41	Poll	HPc	rs797088784G>A	G	G
DMR41	Poll	HPc	rs797088784G>A-3	G	G
DMR41	Poll	HPc	rs797088784G>A-4	G	G
DMR41	Poll	HPc	rs799920960C>G	C	C
DMR41	Poll	HPc	rs799920960C>G-1	C	C
DMR41	Poll	HPc	rs383143898_A	T	G
DMR41	Poll	HPc	rs383143898_B	T	C
DMR41	Poll	HPc	rs383143898_C	T	G
DMR41	Poll	HPc	rs383143898_D	T	C
DMR41	Poll	HPc	rs801127025_A	A	A
DMR41	Poll	HPc	rs801127025_B	A	A
DMR41	Poll	HPc	rs801127025_C	A	A
DMR41	Poll	HPc	rs801127025_D	A	A
DMR4	Horn	HH	rs799187101G>A	G	G
DMR4	Horn	HH	rs799187101G>A-2	G	G
DMR4	Horn	HH	rs799187101G>A-3	G	G
DMR4	Horn	HH	rs800947704C>T	C	C
DMR4	Horn	HH	rs800947704C>T-2	C	C
DMR4	Horn	HH	rs800947704C>T-3	C	C
DMR4	Horn	HH	rs799403053T>C	T	T
DMR4	Horn	HH	rs799403053T>C-2	T	T
DMR4	Horn	HH	rs799403053T>C-3	T	T
DMR4	Horn	HH	rs210350155C>A	C	C
DMR4	Horn	HH	rs210350155C>A-2	C	C
DMR4	Horn	HH	rs210350155C>A-3	C	C
DMR4	Horn	HH	rs797088784G>A	G	G
DMR4	Horn	HH	rs797088784G>A-3	G	G
DMR4	Horn	HH	rs797088784G>A-4	G	G
DMR4	Horn	HH	rs799920960C>G	C	C
DMR4	Horn	HH	rs799920960C>G-1	C	C
DMR4	Horn	HH	rs383143898_A	G	G
DMR4	Horn	HH	rs383143898_B	C	C
DMR4	Horn	HH	rs383143898_C	G	G
DMR4	Horn	HH	rs383143898_D	C	C
DMR4	Horn	HH	rs801127025_A	A	A
DMR4	Horn	HH	rs801127025_B	A	A
DMR4	Horn	HH	rs801127025_C	A	A
DMR4	Horn	HH	rs801127025_D	A	A
DMR42	Poll	PcPc	rs799187101G>A	G	G
DMR42	Poll	PcPc	rs799187101G>A-2	G	G
DMR42	Poll	PcPc	rs799187101G>A-3	G	G
DMR42	Poll	PcPc	rs800947704C>T	C	C
DMR42	Poll	PcPc	rs800947704C>T-2	C	C
DMR42	Poll	PcPc	rs800947704C>T-3	C	C
DMR42	Poll	PcPc	rs799403053T>C	T	T
DMR42	Poll	PcPc	rs799403053T>C-2	T	T
DMR42	Poll	PcPc	rs799403053T>C-3	T	T
DMR42	Poll	PcPc	rs210350155C>A	C	C
DMR42	Poll	PcPc	rs210350155C>A-2	C	C
DMR42	Poll	PcPc	rs210350155C>A-3	C	C
DMR42	Poll	PcPc	rs797088784G>A	G	G
DMR42	Poll	PcPc	rs797088784G>A-3	G	G
DMR42	Poll	PcPc	rs797088784G>A-4	G	G
DMR42	Poll	PcPc	rs799920960C>G	C	C
DMR42	Poll	PcPc	rs799920960C>G-1	C	C
DMR42	Poll	PcPc	rs383143898_A	T	T
DMR42	Poll	PcPc	rs383143898_B	T	T
DMR42	Poll	PcPc	rs383143898_C	T	T
DMR42	Poll	PcPc	rs383143898_D	T	T
DMR42	Poll	PcPc	rs801127025_A	A	A
DMR42	Poll	PcPc	rs801127025_B	A	A
DMR42	Poll	PcPc	rs801127025_C	A	A
DMR42	Poll	PcPc	rs801127025_D	A	A
DMR43	Poll	PcPc	rs799187101G>A	G	G
DMR43	Poll	PcPc	rs799187101G>A-2	G	G
DMR43	Poll	PcPc	rs799187101G>A-3	G	G
DMR43	Poll	PcPc	rs800947704C>T	C	C
DMR43	Poll	PcPc	rs800947704C>T-2	C	C
DMR43	Poll	PcPc	rs800947704C>T-3	C	C
DMR43	Poll	PcPc	rs799403053T>C	T	T
DMR43	Poll	PcPc	rs799403053T>C-2	T	T
DMR43	Poll	PcPc	rs799403053T>C-3	T	T
DMR43	Poll	PcPc	rs210350155C>A	C	C
DMR43	Poll	PcPc	rs210350155C>A-2	C	C
DMR43	Poll	PcPc	rs210350155C>A-3	C	C
DMR43	Poll	PcPc	rs797088784G>A	G	G
DMR43	Poll	PcPc	rs797088784G>A-3	G	G
DMR43	Poll	PcPc	rs797088784G>A-4	G	G
DMR43	Poll	PcPc	rs799920960C>G	C	C
DMR43	Poll	PcPc	rs799920960C>G-1	C	C
DMR43	Poll	PcPc	rs383143898_A	T	T
DMR43	Poll	PcPc	rs383143898_B	T	T
DMR43	Poll	PcPc	rs383143898_C	T	T
DMR43	Poll	PcPc	rs383143898_D	T	T
DMR43	Poll	PcPc	rs801127025_A	A	A
DMR43	Poll	PcPc	rs801127025_B	A	A
DMR43	Poll	PcPc	rs801127025_C	A	A
DMR43	Poll	PcPc	rs801127025_D	A	A
DMR107	Scur	HPc	rs799187101G>A	G	G
DMR107	Scur	HPc	rs799187101G>A-2	G	G
DMR107	Scur	HPc	rs799187101G>A-3	G	G
DMR107	Scur	HPc	rs800947704C>T	C	C
DMR107	Scur	HPc	rs800947704C>T-2	C	C
DMR107	Scur	HPc	rs800947704C>T-3	C	C
DMR107	Scur	HPc	rs799403053T>C	T	T
DMR107	Scur	HPc	rs799403053T>C-2	T	T
DMR107	Scur	HPc	rs799403053T>C-3	T	T
DMR107	Scur	HPc	rs210350155C>A	C	C
DMR107	Scur	HPc	rs210350155C>A-2	C	C
DMR107	Scur	HPc	rs210350155C>A-3	C	C
DMR107	Scur	HPc	rs797088784G>A	G	G
DMR107	Scur	HPc	rs797088784G>A-3	G	G
DMR107	Scur	HPc	rs797088784G>A-4	G	G
DMR107	Scur	HPc	rs799920960C>G	C	C
DMR107	Scur	HPc	rs799920960C>G-1	C	C
DMR107	Scur	HPc	rs383143898_A	T	G
DMR107	Scur	HPc	rs383143898_B	T	C
DMR107	Scur	HPc	rs383143898_C	T	G
DMR107	Scur	HPc	rs383143898_D	T	C
DMR107	Scur	HPc	rs801127025_A	A	A
DMR107	Scur	HPc	rs801127025_B	A	A
DMR107	Scur	HPc	rs801127025_C	A	A
DMR107	Scur	HPc	rs801127025_D	A	A
DMR9	Horn	HH	rs799187101G>A	G	G
DMR9	Horn	HH	rs799187101G>A-2	G	G
DMR9	Horn	HH	rs799187101G>A-3	G	G
DMR9	Horn	HH	rs800947704C>T	C	C
DMR9	Horn	HH	rs800947704C>T-2	C	C
DMR9	Horn	HH	rs800947704C>T-3	C	C
DMR9	Horn	HH	rs799403053T>C	T	T
DMR9	Horn	HH	rs799403053T>C-2	T	T
DMR9	Horn	HH	rs799403053T>C-3	T	T
DMR9	Horn	HH	rs210350155C>A	C	C
DMR9	Horn	HH	rs210350155C>A-2	C	C
DMR9	Horn	HH	rs210350155C>A-3	C	C
DMR9	Horn	HH	rs797088784G>A	G	G
DMR9	Horn	HH	rs797088784G>A-3	G	G
DMR9	Horn	HH	rs797088784G>A-4	G	G
DMR9	Horn	HH	rs799920960C>G	C	C
DMR9	Horn	HH	rs799920960C>G-1	C	C
DMR9	Horn	HH	rs383143898_A	G	G
DMR9	Horn	HH	rs383143898_B	C	C
DMR9	Horn	HH	rs383143898_C	G	G
DMR9	Horn	HH	rs383143898_D	C	C
DMR9	Horn	HH	rs801127025_A	A	A
DMR9	Horn	HH	rs801127025_B	A	A
DMR9	Horn	HH	rs801127025_C	A	A
DMR9	Horn	HH	rs801127025_D	A	A
DMR63	Poll	PcPc	rs799187101G>A	G	G
DMR63	Poll	PcPc	rs799187101G>A-2	G	G
DMR63	Poll	PcPc	rs799187101G>A-3	G	G
DMR63	Poll	PcPc	rs800947704C>T	C	C
DMR63	Poll	PcPc	rs800947704C>T-2	C	C
DMR63	Poll	PcPc	rs800947704C>T-3	C	C
DMR63	Poll	PcPc	rs799403053T>C	T	T
DMR63	Poll	PcPc	rs799403053T>C-2	T	T
DMR63	Poll	PcPc	rs799403053T>C-3	T	T
DMR63	Poll	PcPc	rs210350155C>A	C	C
DMR63	Poll	PcPc	rs210350155C>A-2	C	C
DMR63	Poll	PcPc	rs210350155C>A-3	C	C
DMR63	Poll	PcPc	rs797088784G>A	G	G
DMR63	Poll	PcPc	rs797088784G>A-3	G	G
DMR63	Poll	PcPc	rs797088784G>A-4	G	G
DMR63	Poll	PcPc	rs799920960C>G	C	C
DMR63	Poll	PcPc	rs799920960C>G-1	C	C
DMR63	Poll	PcPc	rs383143898_A	T	T
DMR63	Poll	PcPc	rs383143898_B	T	T
DMR63	Poll	PcPc	rs383143898_C	T	T
DMR63	Poll	PcPc	rs383143898_D	T	T
DMR63	Poll	PcPc	rs801127025_A	A	A
DMR63	Poll	PcPc	rs801127025_B	A	A
DMR63	Poll	PcPc	rs801127025_C	A	A
DMR63	Poll	PcPc	rs801127025_D	A	A
DMR64	Poll	PcPc	rs799187101G>A	G	G
DMR64	Poll	PcPc	rs799187101G>A-2	G	G
DMR64	Poll	PcPc	rs799187101G>A-3	G	G
DMR64	Poll	PcPc	rs800947704C>T	C	C
DMR64	Poll	PcPc	rs800947704C>T-2	C	C
DMR64	Poll	PcPc	rs800947704C>T-3	C	C
DMR64	Poll	PcPc	rs799403053T>C	T	T
DMR64	Poll	PcPc	rs799403053T>C-2	T	T
DMR64	Poll	PcPc	rs799403053T>C-3	T	T
DMR64	Poll	PcPc	rs210350155C>A	C	C
DMR64	Poll	PcPc	rs210350155C>A-2	C	C
DMR64	Poll	PcPc	rs210350155C>A-3	C	C
DMR64	Poll	PcPc	rs797088784G>A	G	G
DMR64	Poll	PcPc	rs797088784G>A-3	G	G
DMR64	Poll	PcPc	rs797088784G>A-4	G	G
DMR64	Poll	PcPc	rs799920960C>G	C	C
DMR64	Poll	PcPc	rs799920960C>G-1	C	C
DMR64	Poll	PcPc	rs383143898_A	T	T
DMR64	Poll	PcPc	rs383143898_B	T	T
DMR64	Poll	PcPc	rs383143898_C	T	T
DMR64	Poll	PcPc	rs383143898_D	T	T
DMR64	Poll	PcPc	rs801127025_A	A	A
DMR64	Poll	PcPc	rs801127025_B	A	A
DMR64	Poll	PcPc	rs801127025_C	A	A
DMR64	Poll	PcPc	rs801127025_D	A	A
DMR109	Scur	HPc	rs799187101G>A	G	G
DMR109	Scur	HPc	rs799187101G>A-2	G	G
DMR109	Scur	HPc	rs799187101G>A-3	G	G
DMR109	Scur	HPc	rs800947704C>T	C	C
DMR109	Scur	HPc	rs800947704C>T-2	C	C
DMR109	Scur	HPc	rs800947704C>T-3	C	C
DMR109	Scur	HPc	rs799403053T>C	T	T
DMR109	Scur	HPc	rs799403053T>C-2	T	T
DMR109	Scur	HPc	rs799403053T>C-3	T	T
DMR109	Scur	HPc	rs210350155C>A	C	C
DMR109	Scur	HPc	rs210350155C>A-2	C	C
DMR109	Scur	HPc	rs210350155C>A-3	C	C
DMR109	Scur	HPc	rs797088784G>A	G	G
DMR109	Scur	HPc	rs797088784G>A-3	G	G
DMR109	Scur	HPc	rs797088784G>A-4	G	G
DMR109	Scur	HPc	rs799920960C>G	C	C
DMR109	Scur	HPc	rs799920960C>G-1	C	C
DMR109	Scur	HPc	rs383143898_A	T	G
DMR109	Scur	HPc	rs383143898_B	T	C
DMR109	Scur	HPc	rs383143898_C	T	G
DMR109	Scur	HPc	rs383143898_D	T	C
DMR109	Scur	HPc	rs801127025_A	A	A
DMR109	Scur	HPc	rs801127025_B	A	A
DMR109	Scur	HPc	rs801127025_C	A	A
DMR109	Scur	HPc	rs801127025_D	A	A
DMR10	Horn	HH	rs799187101G>A	G	G
DMR10	Horn	HH	rs799187101G>A-2	G	G
DMR10	Horn	HH	rs799187101G>A-3	G	G
DMR10	Horn	HH	rs800947704C>T	C	C
DMR10	Horn	HH	rs800947704C>T-2	C	C
DMR10	Horn	HH	rs800947704C>T-3	C	C
DMR10	Horn	HH	rs799403053T>C	T	T
DMR10	Horn	HH	rs799403053T>C-2	T	T
DMR10	Horn	HH	rs799403053T>C-3	T	T
DMR10	Horn	HH	rs210350155C>A	C	C
DMR10	Horn	HH	rs210350155C>A-2	C	C
DMR10	Horn	HH	rs210350155C>A-3	C	C
DMR10	Horn	HH	rs797088784G>A	G	G
DMR10	Horn	HH	rs797088784G>A-3	G	G
DMR10	Horn	HH	rs797088784G>A-4	G	G
DMR10	Horn	HH	rs799920960C>G	C	C
DMR10	Horn	HH	rs799920960C>G-1	C	C
DMR10	Horn	HH	rs383143898_A	G	G
DMR10	Horn	HH	rs383143898_B	C	C
DMR10	Horn	HH	rs383143898_C	G	G
DMR10	Horn	HH	rs383143898_D	C	C
DMR10	Horn	HH	rs801127025_A	A	A
DMR10	Horn	HH	rs801127025_B	A	A
DMR10	Horn	HH	rs801127025_C	A	A
DMR10	Horn	HH	rs801127025_D	A	A
DMR11	Horn	HH	rs799187101G>A	G	G
DMR11	Horn	HH	rs799187101G>A-2	G	G
DMR11	Horn	HH	rs799187101G>A-3	G	G
DMR11	Horn	HH	rs800947704C>T	C	C
DMR11	Horn	HH	rs800947704C>T-2	C	C
DMR11	Horn	HH	rs800947704C>T-3	C	C
DMR11	Horn	HH	rs799403053T>C	T	T
DMR11	Horn	HH	rs799403053T>C-2	T	T
DMR11	Horn	HH	rs799403053T>C-3	T	T
DMR11	Horn	HH	rs210350155C>A	C	C
DMR11	Horn	HH	rs210350155C>A-2	C	C
DMR11	Horn	HH	rs210350155C>A-3	C	C
DMR11	Horn	HH	rs797088784G>A	G	G
DMR11	Horn	HH	rs797088784G>A-3	G	G
DMR11	Horn	HH	rs797088784G>A-4	G	G
DMR11	Horn	HH	rs799920960C>G	C	C
DMR11	Horn	HH	rs799920960C>G-1	C	C
DMR11	Horn	HH	rs383143898_A	G	G
DMR11	Horn	HH	rs383143898_B	C	C
DMR11	Horn	HH	rs383143898_C	G	G
DMR11	Horn	HH	rs383143898_D	C	C
DMR11	Horn	HH	rs801127025_A	A	A
DMR11	Horn	HH	rs801127025_B	A	A
DMR11	Horn	HH	rs801127025_C	A	A
DMR11	Horn	HH	rs801127025_D	A	A
DMR110	Scur	HPc	rs799187101G>A	G	G
DMR110	Scur	HPc	rs799187101G>A-2	G	G
DMR110	Scur	HPc	rs799187101G>A-3	G	G
DMR110	Scur	HPc	rs800947704C>T	C	C
DMR110	Scur	HPc	rs800947704C>T-2	C	C
DMR110	Scur	HPc	rs800947704C>T-3	C	C
DMR110	Scur	HPc	rs799403053T>C	T	T
DMR110	Scur	HPc	rs799403053T>C-2	T	T
DMR110	Scur	HPc	rs799403053T>C-3	T	T
DMR110	Scur	HPc	rs210350155C>A	C	C
DMR110	Scur	HPc	rs210350155C>A-2	C	C
DMR110	Scur	HPc	rs210350155C>A-3	C	C
DMR110	Scur	HPc	rs797088784G>A	G	G
DMR110	Scur	HPc	rs797088784G>A-3	G	G
DMR110	Scur	HPc	rs797088784G>A-4	G	G
DMR110	Scur	HPc	rs799920960C>G	C	C
DMR110	Scur	HPc	rs799920960C>G-1	C	C
DMR110	Scur	HPc	rs383143898_A	T	G
DMR110	Scur	HPc	rs383143898_B	T	C
DMR110	Scur	HPc	rs383143898_C	T	G
DMR110	Scur	HPc	rs383143898_D	T	C
DMR110	Scur	HPc	rs801127025_A	A	A
DMR110	Scur	HPc	rs801127025_B	A	A
DMR110	Scur	HPc	rs801127025_C	A	A
DMR110	Scur	HPc	rs801127025_D	A	A
DMR65	Poll	HPc	rs799187101G>A	G	G
DMR65	Poll	HPc	rs799187101G>A-2	G	G
DMR65	Poll	HPc	rs799187101G>A-3	G	G
DMR65	Poll	HPc	rs800947704C>T	C	C
DMR65	Poll	HPc	rs800947704C>T-2	C	C
DMR65	Poll	HPc	rs800947704C>T-3	C	C
DMR65	Poll	HPc	rs799403053T>C	T	T
DMR65	Poll	HPc	rs799403053T>C-2	T	T
DMR65	Poll	HPc	rs799403053T>C-3	T	T
DMR65	Poll	HPc	rs210350155C>A	C	C
DMR65	Poll	HPc	rs210350155C>A-2	C	C
DMR65	Poll	HPc	rs210350155C>A-3	C	C
DMR65	Poll	HPc	rs797088784G>A	G	G
DMR65	Poll	HPc	rs797088784G>A-3	G	G
DMR65	Poll	HPc	rs797088784G>A-4	G	G
DMR65	Poll	HPc	rs799920960C>G	C	C
DMR65	Poll	HPc	rs799920960C>G-1	C	C
DMR65	Poll	HPc	rs383143898_A	T	G
DMR65	Poll	HPc	rs383143898_B	T	C
DMR65	Poll	HPc	rs383143898_C	T	G
DMR65	Poll	HPc	rs383143898_D	T	C
DMR65	Poll	HPc	rs801127025_A	A	A
DMR65	Poll	HPc	rs801127025_B	A	A
DMR65	Poll	HPc	rs801127025_C	A	A
DMR65	Poll	HPc	rs801127025_D	A	A
DMR66	Poll	HPc	rs799187101G>A	G	G
DMR66	Poll	HPc	rs799187101G>A-2	G	G
DMR66	Poll	HPc	rs799187101G>A-3	G	G
DMR66	Poll	HPc	rs800947704C>T	C	C
DMR66	Poll	HPc	rs800947704C>T-2	C	C
DMR66	Poll	HPc	rs800947704C>T-3	C	C
DMR66	Poll	HPc	rs799403053T>C	T	T
DMR66	Poll	HPc	rs799403053T>C-2	T	T
DMR66	Poll	HPc	rs799403053T>C-3	T	T
DMR66	Poll	HPc	rs210350155C>A	C	C
DMR66	Poll	HPc	rs210350155C>A-2	C	C
DMR66	Poll	HPc	rs210350155C>A-3	C	C
DMR66	Poll	HPc	rs797088784G>A	G	G
DMR66	Poll	HPc	rs797088784G>A-3	G	G
DMR66	Poll	HPc	rs797088784G>A-4	G	G
DMR66	Poll	HPc	rs799920960C>G	C	C
DMR66	Poll	HPc	rs799920960C>G-1	C	C
DMR66	Poll	HPc	rs383143898_A	T	G
DMR66	Poll	HPc	rs383143898_B	T	C
DMR66	Poll	HPc	rs383143898_C	T	G
DMR66	Poll	HPc	rs383143898_D	T	C
DMR66	Poll	HPc	rs801127025_A	A	A
DMR66	Poll	HPc	rs801127025_B	A	A
DMR66	Poll	HPc	rs801127025_C	A	A
DMR66	Poll	HPc	rs801127025_D	A	A
DMR67	Poll	HPf	rs799187101G>A	A	G
DMR67	Poll	HPf	rs799187101G>A-2	A	G
DMR67	Poll	HPf	rs799187101G>A-3	A	G
DMR67	Poll	HPf	rs800947704C>T	T	C
DMR67	Poll	HPf	rs800947704C>T-2	T	C
DMR67	Poll	HPf	rs800947704C>T-3	T	C
DMR67	Poll	HPf	rs799403053T>C	T	C
DMR67	Poll	HPf	rs799403053T>C-2	T	C
DMR67	Poll	HPf	rs799403053T>C-3	T	C
DMR67	Poll	HPf	rs210350155C>A	A	C
DMR67	Poll	HPf	rs210350155C>A-2	A	C
DMR67	Poll	HPf	rs210350155C>A-3	A	C
DMR67	Poll	HPf	rs797088784G>A	A	G
DMR67	Poll	HPf	rs797088784G>A-3	A	G
DMR67	Poll	HPf	rs797088784G>A-4	A	G
DMR67	Poll	HPf	rs799920960C>G	C	G
DMR67	Poll	HPf	rs799920960C>G-1	C	G
DMR67	Poll	HPf	rs383143898_A	G	G
DMR67	Poll	HPf	rs383143898_B	C	C
DMR67	Poll	HPf	rs383143898_C	G	G
DMR67	Poll	HPf	rs383143898_D	C	C
DMR67	Poll	HPf	rs801127025_A	A	G
DMR67	Poll	HPf	rs801127025_B	A	G
DMR67	Poll	HPf	rs801127025_C	A	G
DMR67	Poll	HPf	rs801127025_D	A	G
DMR68	Poll	PcPc	rs799187101G>A	G	G
DMR68	Poll	PcPc	rs799187101G>A-2	G	G
DMR68	Poll	PcPc	rs799187101G>A-3	G	G
DMR68	Poll	PcPc	rs800947704C>T	C	C
DMR68	Poll	PcPc	rs800947704C>T-2	C	C
DMR68	Poll	PcPc	rs800947704C>T-3	C	C
DMR68	Poll	PcPc	rs799403053T>C	T	T
DMR68	Poll	PcPc	rs799403053T>C-2	T	T
DMR68	Poll	PcPc	rs799403053T>C-3	T	T
DMR68	Poll	PcPc	rs210350155C>A	C	C
DMR68	Poll	PcPc	rs210350155C>A-2	C	C
DMR68	Poll	PcPc	rs210350155C>A-3	C	C
DMR68	Poll	PcPc	rs797088784G>A	G	G
DMR68	Poll	PcPc	rs797088784G>A-3	G	G
DMR68	Poll	PcPc	rs797088784G>A-4	G	G
DMR68	Poll	PcPc	rs799920960C>G	C	C
DMR68	Poll	PcPc	rs799920960C>G-1	C	C
DMR68	Poll	PcPc	rs383143898_A	T	T
DMR68	Poll	PcPc	rs383143898_B	T	T
DMR68	Poll	PcPc	rs383143898_C	T	T
DMR68	Poll	PcPc	rs383143898_D	T	T
DMR68	Poll	PcPc	rs801127025_A	A	A
DMR68	Poll	PcPc	rs801127025_B	A	A
DMR68	Poll	PcPc	rs801127025_C	A	A
DMR68	Poll	PcPc	rs801127025_D	A	A
DMR69	Poll	PcPc	rs799187101G>A	G	G
DMR69	Poll	PcPc	rs799187101G>A-2	G	G
DMR69	Poll	PcPc	rs799187101G>A-3	G	G
DMR69	Poll	PcPc	rs800947704C>T	C	C
DMR69	Poll	PcPc	rs800947704C>T-2	C	C
DMR69	Poll	PcPc	rs800947704C>T-3	C	C
DMR69	Poll	PcPc	rs799403053T>C	T	T
DMR69	Poll	PcPc	rs799403053T>C-2	T	T
DMR69	Poll	PcPc	rs799403053T>C-3	T	T
DMR69	Poll	PcPc	rs210350155C>A	C	C
DMR69	Poll	PcPc	rs210350155C>A-2	C	C
DMR69	Poll	PcPc	rs210350155C>A-3	C	C
DMR69	Poll	PcPc	rs797088784G>A	G	G
DMR69	Poll	PcPc	rs797088784G>A-3	G	G
DMR69	Poll	PcPc	rs797088784G>A-4	G	G
DMR69	Poll	PcPc	rs799920960C>G	C	C
DMR69	Poll	PcPc	rs799920960C>G-1	C	C
DMR69	Poll	PcPc	rs383143898_A	T	T
DMR69	Poll	PcPc	rs383143898_B	T	T
DMR69	Poll	PcPc	rs383143898_C	T	T
DMR69	Poll	PcPc	rs383143898_D	T	T
DMR69	Poll	PcPc	rs801127025_A	A	A
DMR69	Poll	PcPc	rs801127025_B	A	A
DMR69	Poll	PcPc	rs801127025_C	A	A
DMR69	Poll	PcPc	rs801127025_D	A	A
DMR44	Poll	HPc	rs799187101G>A	G	G
DMR44	Poll	HPc	rs799187101G>A-2	G	G
DMR44	Poll	HPc	rs799187101G>A-3	G	G
DMR44	Poll	HPc	rs800947704C>T	C	C
DMR44	Poll	HPc	rs800947704C>T-2	C	C
DMR44	Poll	HPc	rs800947704C>T-3	C	C
DMR44	Poll	HPc	rs799403053T>C	T	T
DMR44	Poll	HPc	rs799403053T>C-2	T	T
DMR44	Poll	HPc	rs799403053T>C-3	T	T
DMR44	Poll	HPc	rs210350155C>A	C	C
DMR44	Poll	HPc	rs210350155C>A-2	C	C
DMR44	Poll	HPc	rs210350155C>A-3	C	C
DMR44	Poll	HPc	rs797088784G>A	G	G
DMR44	Poll	HPc	rs797088784G>A-3	G	G
DMR44	Poll	HPc	rs797088784G>A-4	G	G
DMR44	Poll	HPc	rs799920960C>G	C	C
DMR44	Poll	HPc	rs799920960C>G-1	C	C
DMR44	Poll	HPc	rs383143898_A	T	G
DMR44	Poll	HPc	rs383143898_B	T	C
DMR44	Poll	HPc	rs383143898_C	T	G
DMR44	Poll	HPc	rs383143898_D	T	C
DMR44	Poll	HPc	rs801127025_A	A	A
DMR44	Poll	HPc	rs801127025_B	A	A
DMR44	Poll	HPc	rs801127025_C	A	A
DMR44	Poll	HPc	rs801127025_D	A	A
DMR45	Poll	PcPc	rs799187101G>A	G	G
DMR45	Poll	PcPc	rs799187101G>A-2	G	G
DMR45	Poll	PcPc	rs799187101G>A-3	G	G
DMR45	Poll	PcPc	rs800947704C>T	C	C
DMR45	Poll	PcPc	rs800947704C>T-2	C	C
DMR45	Poll	PcPc	rs800947704C>T-3	C	C
DMR45	Poll	PcPc	rs799403053T>C	T	T
DMR45	Poll	PcPc	rs799403053T>C-2	T	T
DMR45	Poll	PcPc	rs799403053T>C-3	T	T
DMR45	Poll	PcPc	rs210350155C>A	C	C
DMR45	Poll	PcPc	rs210350155C>A-2	C	C
DMR45	Poll	PcPc	rs210350155C>A-3	C	C
DMR45	Poll	PcPc	rs797088784G>A	G	G
DMR45	Poll	PcPc	rs797088784G>A-3	G	G
DMR45	Poll	PcPc	rs797088784G>A-4	G	G
DMR45	Poll	PcPc	rs799920960C>G	C	C
DMR45	Poll	PcPc	rs799920960C>G-1	C	C
DMR45	Poll	PcPc	rs383143898_A	T	T
DMR45	Poll	PcPc	rs383143898_B	T	T
DMR45	Poll	PcPc	rs383143898_C	T	T
DMR45	Poll	PcPc	rs383143898_D	T	T
DMR45	Poll	PcPc	rs801127025_A	A	A
DMR45	Poll	PcPc	rs801127025_B	A	A
DMR45	Poll	PcPc	rs801127025_C	A	A
DMR45	Poll	PcPc	rs801127025_D	A	A
DMR46	Poll	PcPc	rs799187101G>A	G	G
DMR46	Poll	PcPc	rs799187101G>A-2	G	G
DMR46	Poll	PcPc	rs799187101G>A-3	G	G
DMR46	Poll	PcPc	rs800947704C>T	C	C
DMR46	Poll	PcPc	rs800947704C>T-2	C	C
DMR46	Poll	PcPc	rs800947704C>T-3	C	C
DMR46	Poll	PcPc	rs799403053T>C	T	T
DMR46	Poll	PcPc	rs799403053T>C-2	T	T
DMR46	Poll	PcPc	rs799403053T>C-3	T	T
DMR46	Poll	PcPc	rs210350155C>A	C	C
DMR46	Poll	PcPc	rs210350155C>A-2	C	C
DMR46	Poll	PcPc	rs210350155C>A-3	C	C
DMR46	Poll	PcPc	rs797088784G>A	G	G
DMR46	Poll	PcPc	rs797088784G>A-3	G	G
DMR46	Poll	PcPc	rs797088784G>A-4	G	G
DMR46	Poll	PcPc	rs799920960C>G	C	C
DMR46	Poll	PcPc	rs799920960C>G-1	C	C
DMR46	Poll	PcPc	rs383143898_A	T	T
DMR46	Poll	PcPc	rs383143898_B	T	T
DMR46	Poll	PcPc	rs383143898_C	T	T
DMR46	Poll	PcPc	rs383143898_D	T	T
DMR46	Poll	PcPc	rs801127025_A	A	A
DMR46	Poll	PcPc	rs801127025_B	A	A
DMR46	Poll	PcPc	rs801127025_C	A	A
DMR46	Poll	PcPc	rs801127025_D	A	A
DMR47	Poll	HPc	rs799187101G>A	G	G
DMR47	Poll	HPc	rs799187101G>A-2	G	G
DMR47	Poll	HPc	rs799187101G>A-3	G	G
DMR47	Poll	HPc	rs800947704C>T	C	C
DMR47	Poll	HPc	rs800947704C>T-2	C	C
DMR47	Poll	HPc	rs800947704C>T-3	C	C
DMR47	Poll	HPc	rs799403053T>C	T	T
DMR47	Poll	HPc	rs799403053T>C-2	T	T
DMR47	Poll	HPc	rs799403053T>C-3	T	T
DMR47	Poll	HPc	rs210350155C>A	C	C
DMR47	Poll	HPc	rs210350155C>A-2	C	C
DMR47	Poll	HPc	rs210350155C>A-3	C	C
DMR47	Poll	HPc	rs797088784G>A	G	G
DMR47	Poll	HPc	rs797088784G>A-3	G	G
DMR47	Poll	HPc	rs797088784G>A-4	G	G
DMR47	Poll	HPc	rs799920960C>G	C	C
DMR47	Poll	HPc	rs799920960C>G-1	C	C
DMR47	Poll	HPc	rs383143898_A	T	G
DMR47	Poll	HPc	rs383143898_B	T	C
DMR47	Poll	HPc	rs383143898_C	T	G
DMR47	Poll	HPc	rs383143898_D	T	C
DMR47	Poll	HPc	rs801127025_A	A	A
DMR47	Poll	HPc	rs801127025_B	A	A
DMR47	Poll	HPc	rs801127025_C	A	A
DMR47	Poll	HPc	rs801127025_D	A	A
DMR48	Poll	HPc	rs799187101G>A	G	G
DMR48	Poll	HPc	rs799187101G>A-2	G	G
DMR48	Poll	HPc	rs799187101G>A-3	G	G
DMR48	Poll	HPc	rs800947704C>T	C	C
DMR48	Poll	HPc	rs800947704C>T-2	C	C
DMR48	Poll	HPc	rs800947704C>T-3	C	C
DMR48	Poll	HPc	rs799403053T>C	T	T
DMR48	Poll	HPc	rs799403053T>C-2	T	T
DMR48	Poll	HPc	rs799403053T>C-3	T	T
DMR48	Poll	HPc	rs210350155C>A	C	C
DMR48	Poll	HPc	rs210350155C>A-2	C	C
DMR48	Poll	HPc	rs210350155C>A-3	C	C
DMR48	Poll	HPc	rs797088784G>A	G	G
DMR48	Poll	HPc	rs797088784G>A-3	G	G
DMR48	Poll	HPc	rs797088784G>A-4	G	G
DMR48	Poll	HPc	rs799920960C>G	C	C
DMR48	Poll	HPc	rs799920960C>G-1	C	C
DMR48	Poll	HPc	rs383143898_A	T	G
DMR48	Poll	HPc	rs383143898_B	T	C
DMR48	Poll	HPc	rs383143898_C	T	G
DMR48	Poll	HPc	rs383143898_D	T	C
DMR48	Poll	HPc	rs801127025_A	A	A
DMR48	Poll	HPc	rs801127025_B	A	A
DMR48	Poll	HPc	rs801127025_C	A	A
DMR48	Poll	HPc	rs801127025_D	A	A
DMR108	Scur	HPc	rs799187101G>A	G	G
DMR108	Scur	HPc	rs799187101G>A-2	G	G
DMR108	Scur	HPc	rs799187101G>A-3	G	G
DMR108	Scur	HPc	rs800947704C>T	C	C
DMR108	Scur	HPc	rs800947704C>T-2	C	C
DMR108	Scur	HPc	rs800947704C>T-3	C	C
DMR108	Scur	HPc	rs799403053T>C	T	T
DMR108	Scur	HPc	rs799403053T>C-2	T	T
DMR108	Scur	HPc	rs799403053T>C-3	T	T
DMR108	Scur	HPc	rs210350155C>A	C	C
DMR108	Scur	HPc	rs210350155C>A-2	C	C
DMR108	Scur	HPc	rs210350155C>A-3	C	C
DMR108	Scur	HPc	rs797088784G>A	G	G
DMR108	Scur	HPc	rs797088784G>A-3	G	G
DMR108	Scur	HPc	rs797088784G>A-4	G	G
DMR108	Scur	HPc	rs799920960C>G	C	C
DMR108	Scur	HPc	rs799920960C>G-1	C	C
DMR108	Scur	HPc	rs383143898_A	T	G
DMR108	Scur	HPc	rs383143898_B	T	C
DMR108	Scur	HPc	rs383143898_C	T	G
DMR108	Scur	HPc	rs383143898_D	T	C
DMR108	Scur	HPc	rs801127025_A	A	A
DMR108	Scur	HPc	rs801127025_B	A	A
DMR108	Scur	HPc	rs801127025_C	A	A
DMR108	Scur	HPc	rs801127025_D	A	A
DMR5	Horn	HH	rs799187101G>A	G	G
DMR5	Horn	HH	rs799187101G>A-2	G	G
DMR5	Horn	HH	rs799187101G>A-3	G	G
DMR5	Horn	HH	rs800947704C>T	-	-
DMR5	Horn	HH	rs800947704C>T-2	-	-
DMR5	Horn	HH	rs800947704C>T-3	-	-
DMR5	Horn	HH	rs799403053T>C	T	T
DMR5	Horn	HH	rs799403053T>C-2	T	T
DMR5	Horn	HH	rs799403053T>C-3	T	T
DMR5	Horn	HH	rs210350155C>A	C	C
DMR5	Horn	HH	rs210350155C>A-2	C	C
DMR5	Horn	HH	rs210350155C>A-3	C	C
DMR5	Horn	HH	rs797088784G>A	G	G
DMR5	Horn	HH	rs797088784G>A-3	G	G
DMR5	Horn	HH	rs797088784G>A-4	G	G
DMR5	Horn	HH	rs799920960C>G	C	C
DMR5	Horn	HH	rs799920960C>G-1	C	C
DMR5	Horn	HH	rs383143898_A	G	G
DMR5	Horn	HH	rs383143898_B	C	C
DMR5	Horn	HH	rs383143898_C	G	G
DMR5	Horn	HH	rs383143898_D	C	C
DMR5	Horn	HH	rs801127025_A	A	A
DMR5	Horn	HH	rs801127025_B	A	A
DMR5	Horn	HH	rs801127025_C	A	A
DMR5	Horn	HH	rs801127025_D	A	A
DMR49	Poll	PcPc	rs799187101G>A	G	G
DMR49	Poll	PcPc	rs799187101G>A-2	G	G
DMR49	Poll	PcPc	rs799187101G>A-3	G	G
DMR49	Poll	PcPc	rs800947704C>T	C	C
DMR49	Poll	PcPc	rs800947704C>T-2	C	C
DMR49	Poll	PcPc	rs800947704C>T-3	C	C
DMR49	Poll	PcPc	rs799403053T>C	T	T
DMR49	Poll	PcPc	rs799403053T>C-2	T	T
DMR49	Poll	PcPc	rs799403053T>C-3	T	T
DMR49	Poll	PcPc	rs210350155C>A	C	C
DMR49	Poll	PcPc	rs210350155C>A-2	C	C
DMR49	Poll	PcPc	rs210350155C>A-3	C	C
DMR49	Poll	PcPc	rs797088784G>A	G	G
DMR49	Poll	PcPc	rs797088784G>A-3	G	G
DMR49	Poll	PcPc	rs797088784G>A-4	G	G
DMR49	Poll	PcPc	rs799920960C>G	C	C
DMR49	Poll	PcPc	rs799920960C>G-1	C	C
DMR49	Poll	PcPc	rs383143898_A	T	T
DMR49	Poll	PcPc	rs383143898_B	T	T
DMR49	Poll	PcPc	rs383143898_C	T	T
DMR49	Poll	PcPc	rs383143898_D	T	T
DMR49	Poll	PcPc	rs801127025_A	A	A
DMR49	Poll	PcPc	rs801127025_B	A	A
DMR49	Poll	PcPc	rs801127025_C	A	A
DMR49	Poll	PcPc	rs801127025_D	A	A
DMR50	Poll	PcPc	rs799187101G>A	G	G
DMR50	Poll	PcPc	rs799187101G>A-2	G	G
DMR50	Poll	PcPc	rs799187101G>A-3	G	G
DMR50	Poll	PcPc	rs800947704C>T	C	C
DMR50	Poll	PcPc	rs800947704C>T-2	C	C
DMR50	Poll	PcPc	rs800947704C>T-3	C	C
DMR50	Poll	PcPc	rs799403053T>C	T	T
DMR50	Poll	PcPc	rs799403053T>C-2	T	T
DMR50	Poll	PcPc	rs799403053T>C-3	T	T
DMR50	Poll	PcPc	rs210350155C>A	C	C
DMR50	Poll	PcPc	rs210350155C>A-2	C	C
DMR50	Poll	PcPc	rs210350155C>A-3	C	C
DMR50	Poll	PcPc	rs797088784G>A	G	G
DMR50	Poll	PcPc	rs797088784G>A-3	G	G
DMR50	Poll	PcPc	rs797088784G>A-4	G	G
DMR50	Poll	PcPc	rs799920960C>G	C	C
DMR50	Poll	PcPc	rs799920960C>G-1	C	C
DMR50	Poll	PcPc	rs383143898_A	T	T
DMR50	Poll	PcPc	rs383143898_B	T	T
DMR50	Poll	PcPc	rs383143898_C	T	T
DMR50	Poll	PcPc	rs383143898_D	T	T
DMR50	Poll	PcPc	rs801127025_A	A	A
DMR50	Poll	PcPc	rs801127025_B	A	A
DMR50	Poll	PcPc	rs801127025_C	A	A
DMR50	Poll	PcPc	rs801127025_D	A	A
DMR6	Horn	HH	rs799187101G>A	G	G
DMR6	Horn	HH	rs799187101G>A-2	G	G
DMR6	Horn	HH	rs799187101G>A-3	G	G
DMR6	Horn	HH	rs800947704C>T	C	C
DMR6	Horn	HH	rs800947704C>T-2	C	C
DMR6	Horn	HH	rs800947704C>T-3	C	C
DMR6	Horn	HH	rs799403053T>C	T	T
DMR6	Horn	HH	rs799403053T>C-2	T	T
DMR6	Horn	HH	rs799403053T>C-3	T	T
DMR6	Horn	HH	rs210350155C>A	C	C
DMR6	Horn	HH	rs210350155C>A-2	C	C
DMR6	Horn	HH	rs210350155C>A-3	C	C
DMR6	Horn	HH	rs797088784G>A	G	G
DMR6	Horn	HH	rs797088784G>A-3	G	G
DMR6	Horn	HH	rs797088784G>A-4	G	G
DMR6	Horn	HH	rs799920960C>G	C	C
DMR6	Horn	HH	rs799920960C>G-1	C	C
DMR6	Horn	HH	rs383143898_A	G	G
DMR6	Horn	HH	rs383143898_B	C	C
DMR6	Horn	HH	rs383143898_C	G	G
DMR6	Horn	HH	rs383143898_D	C	C
DMR6	Horn	HH	rs801127025_A	A	A
DMR6	Horn	HH	rs801127025_B	A	A
DMR6	Horn	HH	rs801127025_C	A	A
DMR6	Horn	HH	rs801127025_D	A	A
DMR51	Poll	PcPc	rs799187101G>A	G	G
DMR51	Poll	PcPc	rs799187101G>A-2	G	G
DMR51	Poll	PcPc	rs799187101G>A-3	G	G
DMR51	Poll	PcPc	rs800947704C>T	C	C
DMR51	Poll	PcPc	rs800947704C>T-2	C	C
DMR51	Poll	PcPc	rs800947704C>T-3	C	C
DMR51	Poll	PcPc	rs799403053T>C	T	T
DMR51	Poll	PcPc	rs799403053T>C-2	T	T
DMR51	Poll	PcPc	rs799403053T>C-3	T	T
DMR51	Poll	PcPc	rs210350155C>A	C	C
DMR51	Poll	PcPc	rs210350155C>A-2	C	C
DMR51	Poll	PcPc	rs210350155C>A-3	C	C
DMR51	Poll	PcPc	rs797088784G>A	G	G
DMR51	Poll	PcPc	rs797088784G>A-3	G	G
DMR51	Poll	PcPc	rs797088784G>A-4	G	G
DMR51	Poll	PcPc	rs799920960C>G	C	C
DMR51	Poll	PcPc	rs799920960C>G-1	C	C
DMR51	Poll	PcPc	rs383143898_A	T	T
DMR51	Poll	PcPc	rs383143898_B	T	T
DMR51	Poll	PcPc	rs383143898_C	T	T
DMR51	Poll	PcPc	rs383143898_D	T	T
DMR51	Poll	PcPc	rs801127025_A	A	A
DMR51	Poll	PcPc	rs801127025_B	A	A
DMR51	Poll	PcPc	rs801127025_C	A	A
DMR51	Poll	PcPc	rs801127025_D	A	A
DMR52	Poll	HPc	rs799187101G>A	G	G
DMR52	Poll	HPc	rs799187101G>A-2	G	G
DMR52	Poll	HPc	rs799187101G>A-3	G	G
DMR52	Poll	HPc	rs800947704C>T	C	C
DMR52	Poll	HPc	rs800947704C>T-2	C	C
DMR52	Poll	HPc	rs800947704C>T-3	C	C
DMR52	Poll	HPc	rs799403053T>C	T	T
DMR52	Poll	HPc	rs799403053T>C-2	T	T
DMR52	Poll	HPc	rs799403053T>C-3	T	T
DMR52	Poll	HPc	rs210350155C>A	C	C
DMR52	Poll	HPc	rs210350155C>A-2	C	C
DMR52	Poll	HPc	rs210350155C>A-3	C	C
DMR52	Poll	HPc	rs797088784G>A	G	G
DMR52	Poll	HPc	rs797088784G>A-3	G	G
DMR52	Poll	HPc	rs797088784G>A-4	G	G
DMR52	Poll	HPc	rs799920960C>G	C	C
DMR52	Poll	HPc	rs799920960C>G-1	C	C
DMR52	Poll	HPc	rs383143898_A	T	G
DMR52	Poll	HPc	rs383143898_B	T	C
DMR52	Poll	HPc	rs383143898_C	T	G
DMR52	Poll	HPc	rs383143898_D	T	C
DMR52	Poll	HPc	rs801127025_A	A	A
DMR52	Poll	HPc	rs801127025_B	A	A
DMR52	Poll	HPc	rs801127025_C	A	A
DMR52	Poll	HPc	rs801127025_D	A	A
DMR7	Horn	HH	rs799187101G>A	G	G
DMR7	Horn	HH	rs799187101G>A-2	G	G
DMR7	Horn	HH	rs799187101G>A-3	G	G
DMR7	Horn	HH	rs800947704C>T	C	C
DMR7	Horn	HH	rs800947704C>T-2	C	C
DMR7	Horn	HH	rs800947704C>T-3	C	C
DMR7	Horn	HH	rs799403053T>C	T	T
DMR7	Horn	HH	rs799403053T>C-2	T	T
DMR7	Horn	HH	rs799403053T>C-3	T	T
DMR7	Horn	HH	rs210350155C>A	C	C
DMR7	Horn	HH	rs210350155C>A-2	C	C
DMR7	Horn	HH	rs210350155C>A-3	C	C
DMR7	Horn	HH	rs797088784G>A	G	G
DMR7	Horn	HH	rs797088784G>A-3	G	G
DMR7	Horn	HH	rs797088784G>A-4	G	G
DMR7	Horn	HH	rs799920960C>G	C	C
DMR7	Horn	HH	rs799920960C>G-1	C	C
DMR7	Horn	HH	rs383143898_A	G	G
DMR7	Horn	HH	rs383143898_B	C	C
DMR7	Horn	HH	rs383143898_C	G	G
DMR7	Horn	HH	rs383143898_D	C	C
DMR7	Horn	HH	rs801127025_A	A	A
DMR7	Horn	HH	rs801127025_B	A	A
DMR7	Horn	HH	rs801127025_C	A	A
DMR7	Horn	HH	rs801127025_D	A	A
DMR53	Poll	HPc	rs799187101G>A	G	G
DMR53	Poll	HPc	rs799187101G>A-2	G	G
DMR53	Poll	HPc	rs799187101G>A-3	G	G
DMR53	Poll	HPc	rs800947704C>T	C	C
DMR53	Poll	HPc	rs800947704C>T-2	C	C
DMR53	Poll	HPc	rs800947704C>T-3	C	C
DMR53	Poll	HPc	rs799403053T>C	T	T
DMR53	Poll	HPc	rs799403053T>C-2	T	T
DMR53	Poll	HPc	rs799403053T>C-3	T	T
DMR53	Poll	HPc	rs210350155C>A	C	C
DMR53	Poll	HPc	rs210350155C>A-2	C	C
DMR53	Poll	HPc	rs210350155C>A-3	C	C
DMR53	Poll	HPc	rs797088784G>A	G	G
DMR53	Poll	HPc	rs797088784G>A-3	G	G
DMR53	Poll	HPc	rs797088784G>A-4	G	G
DMR53	Poll	HPc	rs799920960C>G	C	C
DMR53	Poll	HPc	rs799920960C>G-1	C	C
DMR53	Poll	HPc	rs383143898_A	T	G
DMR53	Poll	HPc	rs383143898_B	T	C
DMR53	Poll	HPc	rs383143898_C	T	G
DMR53	Poll	HPc	rs383143898_D	T	C
DMR53	Poll	HPc	rs801127025_A	A	A
DMR53	Poll	HPc	rs801127025_B	A	A
DMR53	Poll	HPc	rs801127025_C	A	A
DMR53	Poll	HPc	rs801127025_D	A	A
DMR54	Poll	PcPc	rs799187101G>A	G	G
DMR54	Poll	PcPc	rs799187101G>A-2	G	G
DMR54	Poll	PcPc	rs799187101G>A-3	G	G
DMR54	Poll	PcPc	rs800947704C>T	C	C
DMR54	Poll	PcPc	rs800947704C>T-2	C	C
DMR54	Poll	PcPc	rs800947704C>T-3	C	C
DMR54	Poll	PcPc	rs799403053T>C	T	T
DMR54	Poll	PcPc	rs799403053T>C-2	T	T
DMR54	Poll	PcPc	rs799403053T>C-3	T	T
DMR54	Poll	PcPc	rs210350155C>A	C	C
DMR54	Poll	PcPc	rs210350155C>A-2	C	C
DMR54	Poll	PcPc	rs210350155C>A-3	C	C
DMR54	Poll	PcPc	rs797088784G>A	G	G
DMR54	Poll	PcPc	rs797088784G>A-3	G	G
DMR54	Poll	PcPc	rs797088784G>A-4	G	G
DMR54	Poll	PcPc	rs799920960C>G	C	C
DMR54	Poll	PcPc	rs799920960C>G-1	C	C
DMR54	Poll	PcPc	rs383143898_A	T	T
DMR54	Poll	PcPc	rs383143898_B	T	T
DMR54	Poll	PcPc	rs383143898_C	T	T
DMR54	Poll	PcPc	rs383143898_D	T	T
DMR54	Poll	PcPc	rs801127025_A	A	A
DMR54	Poll	PcPc	rs801127025_B	A	A
DMR54	Poll	PcPc	rs801127025_C	A	A
DMR54	Poll	PcPc	rs801127025_D	A	A
DMR55	Poll	HPc	rs799187101G>A	G	G
DMR55	Poll	HPc	rs799187101G>A-2	G	G
DMR55	Poll	HPc	rs799187101G>A-3	G	G
DMR55	Poll	HPc	rs800947704C>T	C	C
DMR55	Poll	HPc	rs800947704C>T-2	C	C
DMR55	Poll	HPc	rs800947704C>T-3	C	C
DMR55	Poll	HPc	rs799403053T>C	T	T
DMR55	Poll	HPc	rs799403053T>C-2	T	T
DMR55	Poll	HPc	rs799403053T>C-3	T	T
DMR55	Poll	HPc	rs210350155C>A	C	C
DMR55	Poll	HPc	rs210350155C>A-2	C	C
DMR55	Poll	HPc	rs210350155C>A-3	C	C
DMR55	Poll	HPc	rs797088784G>A	G	G
DMR55	Poll	HPc	rs797088784G>A-3	G	G
DMR55	Poll	HPc	rs797088784G>A-4	G	G
DMR55	Poll	HPc	rs799920960C>G	C	C
DMR55	Poll	HPc	rs799920960C>G-1	C	C
DMR55	Poll	HPc	rs383143898_A	T	G
DMR55	Poll	HPc	rs383143898_B	T	C
DMR55	Poll	HPc	rs383143898_C	T	G
DMR55	Poll	HPc	rs383143898_D	T	C
DMR55	Poll	HPc	rs801127025_A	A	A
DMR55	Poll	HPc	rs801127025_B	A	A
DMR55	Poll	HPc	rs801127025_C	A	A
DMR55	Poll	HPc	rs801127025_D	A	A
DMR8	Horn	HH	rs799187101G>A	G	G
DMR8	Horn	HH	rs799187101G>A-2	G	G
DMR8	Horn	HH	rs799187101G>A-3	G	G
DMR8	Horn	HH	rs800947704C>T	C	C
DMR8	Horn	HH	rs800947704C>T-2	C	C
DMR8	Horn	HH	rs800947704C>T-3	C	C
DMR8	Horn	HH	rs799403053T>C	T	T
DMR8	Horn	HH	rs799403053T>C-2	T	T
DMR8	Horn	HH	rs799403053T>C-3	T	T
DMR8	Horn	HH	rs210350155C>A	C	C
DMR8	Horn	HH	rs210350155C>A-2	C	C
DMR8	Horn	HH	rs210350155C>A-3	C	C
DMR8	Horn	HH	rs797088784G>A	G	G
DMR8	Horn	HH	rs797088784G>A-3	G	G
DMR8	Horn	HH	rs797088784G>A-4	G	G
DMR8	Horn	HH	rs799920960C>G	C	C
DMR8	Horn	HH	rs799920960C>G-1	C	C
DMR8	Horn	HH	rs383143898_A	G	G
DMR8	Horn	HH	rs383143898_B	C	C
DMR8	Horn	HH	rs383143898_C	G	G
DMR8	Horn	HH	rs383143898_D	C	C
DMR8	Horn	HH	rs801127025_A	A	A
DMR8	Horn	HH	rs801127025_B	A	A
DMR8	Horn	HH	rs801127025_C	A	A
DMR8	Horn	HH	rs801127025_D	A	A
DMR56	Poll	HPc	rs799187101G>A	G	G
DMR56	Poll	HPc	rs799187101G>A-2	G	G
DMR56	Poll	HPc	rs799187101G>A-3	G	G
DMR56	Poll	HPc	rs800947704C>T	C	C
DMR56	Poll	HPc	rs800947704C>T-2	C	C
DMR56	Poll	HPc	rs800947704C>T-3	C	C
DMR56	Poll	HPc	rs799403053T>C	T	T
DMR56	Poll	HPc	rs799403053T>C-2	T	T
DMR56	Poll	HPc	rs799403053T>C-3	T	T
DMR56	Poll	HPc	rs210350155C>A	C	C
DMR56	Poll	HPc	rs210350155C>A-2	C	C
DMR56	Poll	HPc	rs210350155C>A-3	C	C
DMR56	Poll	HPc	rs797088784G>A	G	G
DMR56	Poll	HPc	rs797088784G>A-3	G	G
DMR56	Poll	HPc	rs797088784G>A-4	G	G
DMR56	Poll	HPc	rs799920960C>G	C	C
DMR56	Poll	HPc	rs799920960C>G-1	C	C
DMR56	Poll	HPc	rs383143898_A	T	G
DMR56	Poll	HPc	rs383143898_B	T	C
DMR56	Poll	HPc	rs383143898_C	T	G
DMR56	Poll	HPc	rs383143898_D	T	C
DMR56	Poll	HPc	rs801127025_A	A	A
DMR56	Poll	HPc	rs801127025_B	A	A
DMR56	Poll	HPc	rs801127025_C	A	A
[truncated: 4,426 more rows]
